# Supplementary material for: The European Refinery: Carbon pricing effects on future feedstock choice
Source: Research Square preprint supplement (doi:10.21203/rs.3.rs-7799518/v1), 2026-01-27
Supplement: Supplementary file 1 [file 6a1b8b8b19d46a735ca7d279.xlsx]

## Sheet: Energy Carriers
Name	LHV	Buy cost	Sell price	Direct Emissions	Upstream Emissions	Availability	Demand	Maximum Production	Comment	Source
	GJ/t	EUR/GJ	EUR/GJ	t CO2/GJ	t CO2/GJ	GJ	t	t
Steam	1	14	0	0	0	0	0
CO2	1	30	-70	1	0	200000000	0	3.34767e+08	Sell price is price for transport (50 EUR/t) and storage (20 EUR/t); Buy price is price for transport - price of storage, Maximum production is set to allow climate neutrality in base scenario for linear accounting
Land Transport Fuel	42.6	-	0	0	-	0	1.3042e+07	-	Proxy, based on light fuel oil	https://www.umweltbundesamt.de/publikationen/co2-emission-factors-for-fossil-fuels-0
Aviation Fuel	42.8	-	0	0	-	0	4.48809e+07	-	Proxy , based on kerosene	https://chemrxiv.org/engage/api-gateway/chemrxiv/assets/orp/resource/item/6166e003fb8619d5fcf6efb5/original/lower-heating-value-of-jet-fuel-from-hydrocarbon-class-concentration-data-and-thermo-chemical-reference-data-an-uncertainty-quantification.pdf https://www.umweltbundesamt.de/publikationen/co2-emission-factors-for-fossil-fuels-0
Navigation Fuel	42.6	-	0	0	-	0	3.81835e+07	-	Proxy, based on light fuel oil	https://www.umweltbundesamt.de/publikationen/co2-emission-factors-for-fossil-fuels-0
Asphalt	40.2	-	0	-	-	0	6.42097e+06	6421000
Electricity	1	20	0	0	0		0	-
Light fuel oil	42.6		0	0.074	-	0	0	0		https://www.umweltbundesamt.de/publikationen/co2-emission-factors-for-fossil-fuels-0
Natural Gas	47.1	7.64021	0	0.0577278	0.009675	0	0	0		https://www.umweltbundesamt.de/sites/default/files/medien/1410/publikationen/2019-11-07_cc-37-2019_emissionsbilanz-erneuerbarer-energien_2018.pdf Table 7; https://www.engineeringtoolbox.com/fuels-higher-calorific-values-d_169.html https://www.umweltbundesamt.de/publikationen/co2-emission-factors-for-fossil-fuels-0
Petroleum coke	29.5	-	0	0.1034	-	0	0	0		https://www.engineeringtoolbox.com/fuels-higher-calorific-values-d_169.html https://www.umweltbundesamt.de/publikationen/co2-emission-factors-for-fossil-fuels-0
Heavy fuel oil	39	-	0	0.0797	-	0	0	0		https://www.engineeringtoolbox.com/fuels-higher-calorific-values-d_169.html https://www.umweltbundesamt.de/publikationen/co2-emission-factors-for-fossil-fuels-0
Derived gases	40	-	0	0.0572	-	0	0	0	Assumption - Carbon and Energy balance adapted in processes
Plastic waste	36.9832	5	0	0.0727832	0	1.02113e+09	0	0	Availibility based on projection for 2050 after mechanical recycling; Projections based on https://plasticseurope.org/wp-content/uploads/2024/09/2310838_RoadmapCopyChange_110924.pdf scaled by EU population, Assumption that all plastic waste that is not recycled mechanically is available for chemical recycling or incineration; Consideration of plastic types their carbon content and their LHV based…	https://www.umweltbundesamt.de/publikationen/co2-emission-factors-for-fossil-fuels-0
Biomass solid	17	7	0	0.1	-0.0972222	2.3835e+09	0	-	The LHV and carbon content highly depend on biomass type, water content and other factors. As 90 % of the assesed biomass potential is lignocellulosic biomass, wood chips were considered here as representative; it is important to keep it consistant with the bound carbon and carbon balance, for all processes this was checked, the LHV here is a rough estimate based on https://www.sciencedirect.com/…	Ruiz, Pablo et al. (2015). “The JRC-EU-TIMES model. Bioenergy potentials for EU and neighbouring countries”. In: JRC Science for Policy Report, European Commission.; https://www.umweltbundesamt.de/sites/default/files/medien/1410/publikationen/2019-11-07_cc-37-2019_emissionsbilanz-erneuerbarer-energien_2018.pdf; https://www.sciencedirect.com/science/article/pii/S0961953411001188
Ambient Heat	1	-	0	0	-		0	-
Hydrogen	120	20	0	0	0		0	0		https://www.engineeringtoolbox.com/fuels-higher-calorific-values-d_169.html
Naphtha	42.7	-	0	0.0733	-	0	0	0		https://www.engineeringtoolbox.com/fuels-higher-calorific-values-d_169.html https://www.umweltbundesamt.de/publikationen/co2-emission-factors-for-fossil-fuels-0
Methanol	19.9	-	0	0.0690249	-	0	0	0	Emission stochiometric	https://www.engineeringtoolbox.com/fuels-higher-calorific-values-d_169.html
Crude	41.85	13.0719	0	0.0746556	0.012975		0	0	Based on spot price in October 2024	https://www.umweltbundesamt.de/sites/default/files/medien/1410/publikationen/2019-11-07_cc-37-2019_emissionsbilanz-erneuerbarer-energien_2018.pdf Table 7
Olefines	47.2	-	0	0.074	-	0	3.47703e+07	-	Emissions stochiometric; We assume a direct correlation between olefines demand and the demand for raw plastics after mechanical recycling, as these are the main products for olefines. According to a market analysis carried out for CEFIC the Plastic demand of Europe will increase by 30 %. Through increased mechanical recycling this results in an increased production of raw plastics of only 16 %.1…	https://www.umweltbundesamt.de/sites/default/files/medien/1410/publikationen/2019-11-07_cc-37-2019_emissionsbilanz-erneuerbarer-energien_2018.pdf; https://www.engineeringtoolbox.com/fuels-higher-calorific-values-d_169.html
Aromatics	40.5733	-	0	0.0834197	-	0	1.05325e+07	-	Emissions stochiometric; We assume a direct correlation between aromatics demand and the demand for raw plastics after mechanical recycling, as these are the main products for aromatics. According to a market analysis carried out for CEFIC the Plastic demand of Europe will increase by 30 %. Through increased mechanical recycling this results in an increased production of raw plastics of only 16 %…	https://www.engineeringtoolbox.com/fuels-higher-calorific-values-d_169.html
Jet fuel	42.8	-	0	0.0733	-	0	0	0		https://chemrxiv.org/engage/api-gateway/chemrxiv/assets/orp/resource/item/6166e003fb8619d5fcf6efb5/original/lower-heating-value-of-jet-fuel-from-hydrocarbon-class-concentration-data-and-thermo-chemical-reference-data-an-uncertainty-quantification.pdf
Gasoline	43.4	-	0	0.0730184	-	0	0	0		https://www.engineeringtoolbox.com/fuels-higher-calorific-values-d_169.html https://www.umweltbundesamt.de/publikationen/co2-emission-factors-for-fossil-fuels-0
HVR	40.2	-	0	0.0821523	-	0	0	0	Emissions based on heavy fuel Oil	https://www.ucprc.ucdavis.edu/p-lca/pdf/04_feedstock_web.pdf
Biochar	25	-	0	0.146667	-	0	0	0	Assumption carbon content of nearly 100 %	https://ens.dk/en/our-services/technology-catalogues/technology-data-renewable-fuels

## Sheet: Processes
Name	Long Name	Carrier	Carrier demand	Feedstock	Feedstock demand	Process emissions	CAPEX 2050	OPEX 2050	Product	Production	Lifetime	Comment	Source
			GJ/t		GJ/t	tCO2/t	EUR/t*a	EUR/t		t	years
DAC	DAC	Electricity	3.708			-1						Electricity: 0,612 GJ, Heat: 6,192 GJ via heat pump, COP=2	10.1016/j.joule.2024.02.005
DAC	DAC												10.1016/j.joule.2024.02.005
DAC	DAC						1475						10.1016/j.joule.2024.02.005
DAC	DAC											DEA 2024: https://ens.dk/en/our-services/technology-catalogues/technology-data-	10.1016/j.joule.2024.02.005
DAC	DAC							20					10.1016/j.joule.2024.02.005
DAC	DAC										25		10.1016/j.joule.2024.02.005
DAC	DAC									1		Captured CO2 that is handled as product	10.1016/j.joule.2024.02.005
Alkaline water electrolyser	Alkaline water electrolyser	Electricity	171.429									S16, with 120 GJ/t	https://doi.org/10.1039/D3EE00478C
Alkaline water electrolyser	Alkaline water electrolyser						812.261					S16, with 120 GJ/t and 8700 h/a	https://doi.org/10.1039/D3EE00478C
Alkaline water electrolyser	Alkaline water electrolyser							28.4291				S16, 3.5% of CAPEX	https://doi.org/10.1039/D3EE00478C
Alkaline water electrolyser	Alkaline water electrolyser								Hydrogen	1			https://doi.org/10.1039/D3EE00478C
Alkaline water electrolyser	Alkaline water electrolyser										30		https://doi.org/10.1039/D3EE00478C
SMR	SMR with CCS			Natural Gas	4							All normalized on Jetfuel; with LHV of 50 GJ/t; Figure 7-1: Base Case 3) Block flow diagrams with main material streams	deliverable-d3_reference-plants-economic-evaluation_final_code.pdf (sintef.no)
SMR	SMR with CCS			Derived gases	0.7056				Hydrogen	0.0241		Figure 7-1: Base Case 3) Block flow diagrams with main material streams	deliverable-d3_reference-plants-economic-evaluation_final_code.pdf (sintef.no)
SMR	SMR with CCS											As feedstock as emissions are captured	deliverable-d3_reference-plants-economic-evaluation_final_code.pdf (sintef.no)
SMR	SMR with CCS											Table 4. Investment Cost summary table; for Carbon capture without CHP Base case 4.4 deliverable 5; Scaled to Base Case 3	deliverable-d3_reference-plants-economic-evaluation_final_code.pdf (sintef.no)
SMR	SMR with CCS						96.7186					Assumption 10% Price reduction of CC until 2050	deliverable-d3_reference-plants-economic-evaluation_final_code.pdf (sintef.no)
SMR	SMR with CCS											For SMR: Assumption 2 % of Capex; For CC without CHP Basecase 4.4 Deliverarble 5; Scaled to Base Case 3	deliverable-d3_reference-plants-economic-evaluation_final_code.pdf (sintef.no)
SMR	SMR with CCS							7.90694				For SMR: Assumption 2 % of Capex; For CC without CHP Basecase 4.4 Deliverarble 5; Assumption 10% reduction for CC; Scaled to Base Case 3	deliverable-d3_reference-plants-economic-evaluation_final_code.pdf (sintef.no)
SMR	SMR with CCS					0.026356						With 90% capture efficiency; with 0.056 t CO2/GJ for gas, and 0.0572 t CO2/GJ for derived fuel gases	deliverable-d3_reference-plants-economic-evaluation_final_code.pdf (sintef.no)
SMR	SMR with CCS	Electricity	0.518336									For SMR: Figure 7 - 3: Base Case 3) Electricity network; For CC without CHP Table 20; Base case 4-4 D5, deliverarble 4; Scaled to Base Case 3	deliverable-d3_reference-plants-economic-evaluation_final_code.pdf (sintef.no)
SMR	SMR with CCS								CO2 Captured	0.237204		With 90% capture efficiency; with 0.056 t CO2/GJ for gas, and 0.0572 t CO2/GJ for derived fuel gases	deliverable-d3_reference-plants-economic-evaluation_final_code.pdf (sintef.no)
SMR	SMR with CCS	Steam	3.55585									For SMR: Figure 7 - 4: Base Case 3) Steam networks; For CC without CHP Table 20; Base case 4-4 D5, deliverarble 4 Scaled to Base Case 3	deliverable-d3_reference-plants-economic-evaluation_final_code.pdf (sintef.no)
SMR	SMR with CCS										25	Assumption	deliverable-d3_reference-plants-economic-evaluation_final_code.pdf (sintef.no)
Heat Pump	Heat Pump	Electricity	1										https://doi.org/10.1016/j.jclepro.2019.03.086 based on DEA, 2016. Technology Data for Energy Plants Updated Chapters. August 2016. Danish Energy Agency, p. 117. Copenhagen, Denmark. Available at: https://ens. dk/sites/ens.dk/files/Analyser/update_-_technology_data_catalogue_for_ energy_plants_-_aug_2016.pdf. (Accessed 1 April 2018)
Heat Pump	Heat Pump	Ambient Heat	2										https://doi.org/10.1016/j.jclepro.2019.03.086 based on DEA, 2016. Technology Data for Energy Plants Updated Chapters. August 2016. Danish Energy Agency, p. 117. Copenhagen, Denmark. Available at: https://ens. dk/sites/ens.dk/files/Analyser/update_-_technology_data_catalogue_for_ energy_plants_-_aug_2016.pdf. (Accessed 1 April 2018)
Heat Pump	Heat Pump												https://doi.org/10.1016/j.jclepro.2019.03.086 based on DEA, 2016. Technology Data for Energy Plants Updated Chapters. August 2016. Danish Energy Agency, p. 117. Copenhagen, Denmark. Available at: https://ens. dk/sites/ens.dk/files/Analyser/update_-_technology_data_catalogue_for_ energy_plants_-_aug_2016.pdf. (Accessed 1 April 2018)
Heat Pump	Heat Pump						530						https://doi.org/10.1016/j.jclepro.2019.03.086 based on DEA, 2016. Technology Data for Energy Plants Updated Chapters. August 2016. Danish Energy Agency, p. 117. Copenhagen, Denmark. Available at: https://ens. dk/sites/ens.dk/files/Analyser/update_-_technology_data_catalogue_for_ energy_plants_-_aug_2016.pdf. (Accessed 1 April 2018)
Heat Pump	Heat Pump											2030, 8000 FLH	https://doi.org/10.1016/j.jclepro.2019.03.086 based on DEA, 2016. Technology Data for Energy Plants Updated Chapters. August 2016. Danish Energy Agency, p. 117. Copenhagen, Denmark. Available at: https://ens. dk/sites/ens.dk/files/Analyser/update_-_technology_data_catalogue_for_ energy_plants_-_aug_2016.pdf. (Accessed 1 April 2018)
Heat Pump	Heat Pump							1.54167				2050 8000 FLH	https://doi.org/10.1016/j.jclepro.2019.03.086 based on DEA, 2016. Technology Data for Energy Plants Updated Chapters. August 2016. Danish Energy Agency, p. 117. Copenhagen, Denmark. Available at: https://ens. dk/sites/ens.dk/files/Analyser/update_-_technology_data_catalogue_for_ energy_plants_-_aug_2016.pdf. (Accessed 1 April 2018)
Heat Pump	Heat Pump								Steam	1.42857		Assuming Waste Heat availibity, temperature difference upto ~80°C, 2.1 GJ/t Steam	https://doi.org/10.1016/j.jclepro.2019.03.086 based on DEA, 2016. Technology Data for Energy Plants Updated Chapters. August 2016. Danish Energy Agency, p. 117. Copenhagen, Denmark. Available at: https://ens. dk/sites/ens.dk/files/Analyser/update_-_technology_data_catalogue_for_ energy_plants_-_aug_2016.pdf. (Accessed 1 April 2018)
Heat Pump	Heat Pump										25		https://doi.org/10.1016/j.jclepro.2019.03.086 based on DEA, 2016. Technology Data for Energy Plants Updated Chapters. August 2016. Danish Energy Agency, p. 117. Copenhagen, Denmark. Available at: https://ens. dk/sites/ens.dk/files/Analyser/update_-_technology_data_catalogue_for_ energy_plants_-_aug_2016.pdf. (Accessed 1 April 2018)
Waste Incineration	Waste Incineration with CCS											With 2.69 t CO2/t MPW and 36.98 GJ/t MPW based on current material mix, 22% efficiency (Table 7), 300 kWh/t CO2 (page 36) energy demand for carbon capture, 0.036 GJ/kWh, 95 % capture rate	ZWE Capturing Materials or Carbon Final Report (europa.eu)
Waste Incineration	Waste Incineration with CCS			Plastic Waste	37							small electricity only, with 36.98 GJ/t MPW based on current fuel mix	ZWE Capturing Materials or Carbon Final Report (europa.eu)
Waste Incineration	Waste Incineration with CCS					0.1345						95% capture rate (medium) and 2.69 t CO2/ tMPW	ZWE Capturing Materials or Carbon Final Report (europa.eu)
Waste Incineration	Waste Incineration with CCS											Table 13	ZWE Capturing Materials or Carbon Final Report (europa.eu)
Waste Incineration	Waste Incineration with CCS						550						ZWE Capturing Materials or Carbon Final Report (europa.eu)
Waste Incineration	Waste Incineration with CCS											Table 13	ZWE Capturing Materials or Carbon Final Report (europa.eu)
Waste Incineration	Waste Incineration with CCS							20					ZWE Capturing Materials or Carbon Final Report (europa.eu)
Waste Incineration	Waste Incineration with CCS								Electricity	5.38006
Waste Incineration	Waste Incineration with CCS								CO2 Captured	2.5555		95% capture rate (medium) and 2.69 t CO2/ t MPW
Waste Incineration	Waste Incineration with CCS										20	Rable 13	ZWE Capturing Materials or Carbon Final Report (europa.eu)
Waste Incineration CHP	Waste Incineration CHP with CCS			Plastic Waste	37							Small electricity only; with 36.98 GJ/t MPW and 2.69 t CO2/t MPW based current plastic mix	ZWE Capturing Materials or Carbon Final Report (europa.eu)
Waste Incineration CHP	Waste Incineration CHP with CCS					0.1345						95% capture rate (medium) and 2.69 t CO2/ t MPW	ZWE Capturing Materials or Carbon Final Report (europa.eu)
Waste Incineration CHP	Waste Incineration CHP with CCS											Table 13	ZWE Capturing Materials or Carbon Final Report (europa.eu)
Waste Incineration CHP	Waste Incineration CHP with CCS						316.667						ZWE Capturing Materials or Carbon Final Report (europa.eu)
Waste Incineration CHP	Waste Incineration CHP with CCS											Table 13	ZWE Capturing Materials or Carbon Final Report (europa.eu)
Waste Incineration CHP	Waste Incineration CHP with CCS							12					ZWE Capturing Materials or Carbon Final Report (europa.eu)
Waste Incineration CHP	Waste Incineration CHP with CCS												ZWE Capturing Materials or Carbon Final Report (europa.eu)
Waste Incineration CHP	Waste Incineration CHP with CCS								CO2 Captured	2.5555		95% capture rate (medium) and 2.69 t CO2/ t MPW	ZWE Capturing Materials or Carbon Final Report (europa.eu)
Waste Incineration CHP	Waste Incineration CHP with CCS								Electricity	2.48964		with 2.69 t CO2/ t PW, 12% efficience (table 7), 212 kwh/tco2 (page 36) energy demand for carbon capture, 0.036 GJ/kWh, 36.98 GJ/t MPW	ZWE Capturing Materials or Carbon Final Report (europa.eu)
Waste Incineration CHP	Waste Incineration CHP with CCS								Steam	10.0148		with 2.69 t CO2/ t PW, 35% efficience (table 7), 670 kWh/t CO2 (page 36) energy demand for carbon capture, 0.036 GJ/kWh, 2.1 GJ/t Steam	ZWE Capturing Materials or Carbon Final Report (europa.eu)
Waste Incineration CHP	Waste Incineration CHP with CCS										20	Table 13	ZWE Capturing Materials or Carbon Final Report (europa.eu)
Pyrolysis	Catalysed Waste Pyrolysis Naphtha	Electricity	1.05882									with 0.068$/kWh (s12) and 2ct/kg (S3)	10.1039/D3EE00749A
Pyrolysis	Catalysed Waste Pyrolysis Naphtha	Derived gases	11.1									S19, It is is not entirely clear what fuel	10.1039/D3EE00749A
Pyrolysis	Catalysed Waste Pyrolysis Naphtha												10.1039/D3EE00749A
Pyrolysis	Catalysed Waste Pyrolysis Naphtha			Plastic Waste	86							Table 1 with 36.98 GJ/t MPW	10.1039/D3EE00749A
Pyrolysis	Catalysed Waste Pyrolysis Naphtha			Derived gases	6.5							S19, other fuel might be used	10.1039/D3EE00749A
Pyrolysis	Catalysed Waste Pyrolysis Naphtha					0.88						S19 Reaction emissions	10.1039/D3EE00749A
Pyrolysis	Catalysed Waste Pyrolysis Naphtha											With 0.92 EUR/$ 2024 and 43.3 kt/a S3	10.1039/D3EE00749A
Pyrolysis	Catalysed Waste Pyrolysis Naphtha						1483.91					Assumption 10% Reduced	10.1039/D3EE00749A
Pyrolysis	Catalysed Waste Pyrolysis Naphtha											S3; Catalyst cost, OSBL Utilities, Waste disposal, Fixed Cost, with 0.92 EUR/$ 2024	10.1039/D3EE00749A
Pyrolysis	Catalysed Waste Pyrolysis Naphtha							275.724				Assumption 10% Reduced	10.1039/D3EE00749A
Pyrolysis	Catalysed Waste Pyrolysis Naphtha								Naphtha	1			10.1039/D3EE00749A
Pyrolysis	Catalysed Waste Pyrolysis Naphtha										30		10.1039/D3EE00749A
Pyrolysis	Catalysed Waste Pyrolysis Aromatics rich	Electricity	1.53529									with 0.068$/kWh (s12) and 2.9ct/kg (S17)	10.1039/D3EE00749A
Pyrolysis	Catalysed Waste Pyrolysis Aromatics rich	Derived gases	19.2									S21, Process fuel	10.1039/D3EE00749A
Pyrolysis	Catalysed Waste Pyrolysis Aromatics rich												10.1039/D3EE00749A
Pyrolysis	Catalysed Waste Pyrolysis Aromatics rich			Plastic Waste	123.267							Table 1 with 36.98 GJ/t MPW	10.1039/D3EE00749A
Pyrolysis	Catalysed Waste Pyrolysis Aromatics rich			Derived gases	2.47							S19, other fuel might be used	10.1039/D3EE00749A
Pyrolysis	Catalysed Waste Pyrolysis Aromatics rich					0						S21, 1.23 t Reaction Emissions; but Carbon Balance shows that this might be fuel emissions	10.1039/D3EE00749A
Pyrolysis	Catalysed Waste Pyrolysis Aromatics rich											with 0.92 EUR/$ 2024 and 43.3 kt/a S17	10.1039/D3EE00749A
Pyrolysis	Catalysed Waste Pyrolysis Aromatics rich						2017.01					Assumption 10% Reduced	10.1039/D3EE00749A
Pyrolysis	Catalysed Waste Pyrolysis Aromatics rich											S17 Catalyst cost, OSBL Utilities, Waste disposal, other raw materials, Fixed Costs; with 0.92 EUR/$ 2024	10.1039/D3EE00749A
Pyrolysis	Catalysed Waste Pyrolysis Aromatics rich							1169.96				Assumption 10% Reduced	10.1039/D3EE00749A
Pyrolysis	Catalysed Waste Pyrolysis Aromatics rich								Aromatics	1		BTX aromatics	10.1039/D3EE00749A
Pyrolysis	Catalysed Waste Pyrolysis Aromatics rich								Gasoline	0.5		Other aromatics; mainly cumene also used for plastic production; assumption can be used in gasoline	10.1039/D3EE00749A
Pyrolysis	Catalysed Waste Pyrolysis Aromatics rich								Naphtha	0.866667		Naphtha	10.1039/D3EE00749A
Pyrolysis	Catalysed Waste Pyrolysis Aromatics rich								Derived gases	0.166667		NGL	10.1039/D3EE00749A
Pyrolysis	Catalysed Waste Pyrolysis Aromatics rich										30		10.1039/D3EE00749A
Gasif.MeOH Synthesis	Waste Gasification Methanol Synthesis	Electricity	1.66572										Techno-economic analysis and life cycle assessment of mixed plastic waste gasification for production of methanol and hydrogen - Green Chemistry (RSC Publishing)
Gasif.MeOH Synthesis	Waste Gasification Methanol Synthesis	Derived gases	10.9										Techno-economic analysis and life cycle assessment of mixed plastic waste gasification for production of methanol and hydrogen - Green Chemistry (RSC Publishing)
Gasif.MeOH Synthesis	Waste Gasification Methanol Synthesis												Techno-economic analysis and life cycle assessment of mixed plastic waste gasification for production of methanol and hydrogen - Green Chemistry (RSC Publishing)
Gasif.MeOH Synthesis	Waste Gasification Methanol Synthesis			Plastic Waste	29.24							With 43 GJ/t as in the source Polyolefines are mainly used	Techno-economic analysis and life cycle assessment of mixed plastic waste gasification for production of methanol and hydrogen - Green Chemistry (RSC Publishing)
Gasif.MeOH Synthesis	Waste Gasification Methanol Synthesis					0							Techno-economic analysis and life cycle assessment of mixed plastic waste gasification for production of methanol and hydrogen - Green Chemistry (RSC Publishing)
Gasif.MeOH Synthesis	Waste Gasification Methanol Synthesis											with 0.92 EUR/$	Techno-economic analysis and life cycle assessment of mixed plastic waste gasification for production of methanol and hydrogen - Green Chemistry (RSC Publishing)
Gasif.MeOH Synthesis	Waste Gasification Methanol Synthesis						1100.24					Assumption 10% Reduced	Techno-economic analysis and life cycle assessment of mixed plastic waste gasification for production of methanol and hydrogen - Green Chemistry (RSC Publishing)
Gasif.MeOH Synthesis	Waste Gasification Methanol Synthesis											with 0.92 EUR/$	Techno-economic analysis and life cycle assessment of mixed plastic waste gasification for production of methanol and hydrogen - Green Chemistry (RSC Publishing)
Gasif.MeOH Synthesis	Waste Gasification Methanol Synthesis							116.633				Assumption 10% Reduced	Techno-economic analysis and life cycle assessment of mixed plastic waste gasification for production of methanol and hydrogen - Green Chemistry (RSC Publishing)
Gasif.MeOH Synthesis	Waste Gasification Methanol Synthesis								MeOH	1			Techno-economic analysis and life cycle assessment of mixed plastic waste gasification for production of methanol and hydrogen - Green Chemistry (RSC Publishing)
Gasif.MeOH Synthesis	Waste Gasification Methanol Synthesis										30	Assumption	Techno-economic analysis and life cycle assessment of mixed plastic waste gasification for production of methanol and hydrogen - Green Chemistry (RSC Publishing)
Refinery Basic	Basic Refinery with CCS			Crude	447.858							Base Case 3-1 All normalized on jet fuel; without SRM, ISO, NSU, and CRF; 50% reduced DCU; Without CHP for Carbon Capture; Mix of crude oils. without biodeisel and ethanol, LHV of 44.769	d2_bd0839a-pr-0000-re-001_revf02.pdf (sintef.no)
Refinery Basic	Basic Refinery with CCS			Hydrogen	2.892
Refinery Basic	Basic Refinery with CCS					0.205101						with 8400h/a	d2_bd0839a-pr-0000-re-001_revf02.pdf (sintef.no)
Refinery Basic	Basic Refinery with CCS											with 0.92 EUR/$	deliverable-d3_reference-plants-economic-evaluation_final_code.pdf (sintef.no)
Refinery Basic	Basic Refinery with CCS						6491.08					with 0.92 EUR/$; assumption cost for ccs reduces by 10%	deliverable-d3_reference-plants-economic-evaluation_final_code.pdf (sintef.no)
Refinery Basic	Basic Refinery with CCS											with 0.92 EUR/$	deliverable-d3_reference-plants-economic-evaluation_final_code.pdf (sintef.no)
Refinery Basic	Basic Refinery with CCS							451.94				with 0.92 EUR/$; assumption cost for ccs reduces by 10%	deliverable-d3_reference-plants-economic-evaluation_final_code.pdf (sintef.no)
Refinery Basic	Basic Refinery with CCS								Derived gases	0.4696			d2_bd0839a-pr-0000-re-001_revf02.pdf (sintef.no)
Refinery Basic	Basic Refinery with CCS								Olefines	0.1971			d2_bd0839a-pr-0000-re-001_revf02.pdf (sintef.no)
Refinery Basic	Basic Refinery with CCS								Naphtha	2.1596			d2_bd0839a-pr-0000-re-001_revf02.pdf (sintef.no)
Refinery Basic	Basic Refinery with CCS								Gasoline	0.7228			d2_bd0839a-pr-0000-re-001_revf02.pdf (sintef.no)
Refinery Basic	Basic Refinery with CCS								Jet fuel	1			d2_bd0839a-pr-0000-re-001_revf02.pdf (sintef.no)
Refinery Basic	Basic Refinery with CCS								Light fuel oil	3.7938		Diesel (Road + Marine)	d2_bd0839a-pr-0000-re-001_revf02.pdf (sintef.no)
Refinery Basic	Basic Refinery with CCS								Heavy fuel oil	0.3274		Heating OIl ü Low Sulphur FUel Oil)	d2_bd0839a-pr-0000-re-001_revf02.pdf (sintef.no)
Refinery Basic	Basic Refinery with CCS								Bitumen	1.086			d2_bd0839a-pr-0000-re-001_revf02.pdf (sintef.no)
Refinery Basic	Basic Refinery with CCS								Petroleum coke	0.2613			d2_bd0839a-pr-0000-re-001_revf02.pdf (sintef.no)
Refinery Basic	Basic Refinery with CCS								Electricity	1.1851		Adapted
Refinery Basic	Basic Refinery with CCS								Steam	3.01927		Adapted, 2.1 GJ/t Steam
Refinery Basic	Basic Refinery with CCS								CO2 Captured	1.665		CO2 Captured; based on Table 17; Base case 03-01, deliverarble 4	Table 17; Base case 03-01, deliverarble 4
Refinery Basic	Basic Refinery with CCS										25	Many parts have a longer lifetime	deliverable-d3_reference-plants-economic-evaluation_final_code.pdf (sintef.no)
ISO, NSU, CRF	Combined ISO, NSU, CRF			Naphtha	83.6493							Use heavy naphtha (HT naphtha) as a feedstock isomerization, catalytic reforming, and the naphtha splitter, reference production 1 t jet fuel from the original refinery; Assumptions based on refinery type 3	d2_bd0839a-pr-0000-re-001_revf02.pdf (sintef.no)
ISO, NSU, CRF	Combined ISO, NSU, CRF								Gasoline	1.788			d2_bd0839a-pr-0000-re-001_revf02.pdf (sintef.no)
ISO, NSU, CRF	Combined ISO, NSU, CRF								Hydrogen	0.0351			d2_bd0839a-pr-0000-re-001_revf02.pdf (sintef.no)
ISO, NSU, CRF	Combined ISO, NSU, CRF								Derived gases	0.05568		Adaptation of energy balance	d2_bd0839a-pr-0000-re-001_revf02.pdf (sintef.no)
ISO, NSU, CRF	Combined ISO, NSU, CRF					0.465322							d2_bd0839a-pr-0000-re-001_revf02.pdf (sintef.no)
ISO, NSU, CRF	Combined ISO, NSU, CRF	Electricity	0.127643										d2_bd0839a-pr-0000-re-001_revf02.pdf (sintef.no)
ISO, NSU, CRF	Combined ISO, NSU, CRF	Steam	0.764328										d2_bd0839a-pr-0000-re-001_revf02.pdf (sintef.no)
ISO, NSU, CRF	Combined ISO, NSU, CRF										25		d2_bd0839a-pr-0000-re-001_revf02.pdf (sintef.no)
ISO, NSU, CRF	Combined ISO, NSU, CRF						139					Table 4. Investment Cost Summary Table 79 +15 +18 + 27M USD	d2_bd0839a-pr-0000-re-001_revf02.pdf (sintef.no)
ISO, NSU, CRF	Combined ISO, NSU, CRF							0				Assumption no additional OPEX	d2_bd0839a-pr-0000-re-001_revf02.pdf (sintef.no)
HCK	Hydrockracking Light fuel oil feedstock						178.289					HCK, 60 000 bpsd, 2782 kt/a outflow; Table 4. Investment Cost Summary Table	d2_bd0839a-pr-0000-re-001_revf02.pdf (sintef.no)
HCK	Hydrockracking Light fuel oil feedstock											Figure 8-1: Base Case 4) Block flow diagrams with main material streams	d2_bd0839a-pr-0000-re-001_revf02.pdf (sintef.no)
HCK	Hydrockracking Light fuel oil feedstock			Light fuel oil	42.4899							Energy balance	d2_bd0839a-pr-0000-re-001_revf02.pdf (sintef.no)
HCK	Hydrockracking Light fuel oil feedstock			Hydrogen	0.310078							Energy balance	d2_bd0839a-pr-0000-re-001_revf02.pdf (sintef.no)
HCK	Hydrockracking Light fuel oil feedstock	Derived gases	0.0603882									based on Figure 8-6: Base Case 4) Fuel Gas/Offgas networks normalized on output	d2_bd0839a-pr-0000-re-001_revf02.pdf (sintef.no)
HCK	Hydrockracking Light fuel oil feedstock	Electricity	0.264562									Figure 8-3: Base Case 4) Electricity network normalized on output	d2_bd0839a-pr-0000-re-001_revf02.pdf (sintef.no)
HCK	Hydrockracking Light fuel oil feedstock					0.000508786						Carbon balance	d2_bd0839a-pr-0000-re-001_revf02.pdf (sintef.no)
HCK	Hydrockracking Light fuel oil feedstock								Steam	0.107963		Figure 8 - 4: Base Case 4) Steam networks, normalized on output, 2.1 GJ/t Steam	d2_bd0839a-pr-0000-re-001_revf02.pdf (sintef.no)
HCK	Hydrockracking Light fuel oil feedstock								Jet fuel	1			d2_bd0839a-pr-0000-re-001_revf02.pdf (sintef.no)
HCK	Hydrockracking Light fuel oil feedstock							5.34867			25	Assumption 3 % CAPEX	d2_bd0839a-pr-0000-re-001_revf02.pdf (sintef.no)
HCK	Hydrockracking Heavy fuel oil feedstock											HCK, 60 000 bpsd, 2782 kt/a outflow; Table 4. Investment Cost Summary Table	d2_bd0839a-pr-0000-re-001_revf02.pdf (sintef.no)
HCK	Hydrockracking Heavy fuel oil feedstock						178.289					Figure 8-1: Base Case 4) Block flow diagrams with main material streams	d2_bd0839a-pr-0000-re-001_revf02.pdf (sintef.no)
HCK	Hydrockracking Heavy fuel oil feedstock			Hydrogen	5.62963							Energy balance	d2_bd0839a-pr-0000-re-001_revf02.pdf (sintef.no)
HCK	Hydrockracking Heavy fuel oil feedstock			Heavy fuel oil	37.1704							Energy balance	d2_bd0839a-pr-0000-re-001_revf02.pdf (sintef.no)
HCK	Hydrockracking Heavy fuel oil feedstock	Derived gases	0.0603882									based on Figure 8-6: Base Case 4) Fuel Gas/Offgas networks normalized on output	d2_bd0839a-pr-0000-re-001_revf02.pdf (sintef.no)
HCK	Hydrockracking Heavy fuel oil feedstock					0.00266099						Carbon balance	d2_bd0839a-pr-0000-re-001_revf02.pdf (sintef.no)
HCK	Hydrockracking Heavy fuel oil feedstock											Table 8-7: Base Case 4) CO2 emissions per unit	d2_bd0839a-pr-0000-re-001_revf02.pdf (sintef.no)
HCK	Hydrockracking Heavy fuel oil feedstock								Steam	0.107963		2.1 GJ/t Steam	d2_bd0839a-pr-0000-re-001_revf02.pdf (sintef.no)
HCK	Hydrockracking Heavy fuel oil feedstock								Jet fuel	1			d2_bd0839a-pr-0000-re-001_revf02.pdf (sintef.no)
HCK	Hydrockracking Heavy fuel oil feedstock	Electricity	0.264562									Figure 8-3: Base Case 4) Electricity network normalized on output	d2_bd0839a-pr-0000-re-001_revf02.pdf (sintef.no)
HCK	Hydrockracking Heavy fuel oil feedstock							5.34867				Assumption 3 % CAPEX	d2_bd0839a-pr-0000-re-001_revf02.pdf (sintef.no)
HCK	Hydrockracking Heavy fuel oil feedstock										25		d2_bd0839a-pr-0000-re-001_revf02.pdf (sintef.no)
DCU	Delayed Coking Unit											Assumption - use of DCU is used to shift productionto heavy fuel oil; Compare Basecase 1 (Simplification); Figure 7-1: Base Case 3) Block flow diagrams with main material streams	d2_bd0839a-pr-0000-re-001_revf02.pdf (sintef.no)
DCU	Delayed Coking Unit						308						d2_bd0839a-pr-0000-re-001_revf02.pdf (sintef.no)
DCU	Delayed Coking Unit												d2_bd0839a-pr-0000-re-001_revf02.pdf (sintef.no)
DCU	Delayed Coking Unit							0					d2_bd0839a-pr-0000-re-001_revf02.pdf (sintef.no)
DCU	Delayed Coking Unit			Bitumen	75.2544							Figure 7-1: Base Case 3) Block flow diagrams with main material streams	d2_bd0839a-pr-0000-re-001_revf02.pdf (sintef.no)
DCU	Delayed Coking Unit								Heavy fuel oil	1.181		Figure 7-1: Base Case 3) Block flow diagrams with main material streams	d2_bd0839a-pr-0000-re-001_revf02.pdf (sintef.no)
DCU	Delayed Coking Unit								Petroleum coke	0.523		Figure 7-1: Base Case 3) Block flow diagrams with main material streams	d2_bd0839a-pr-0000-re-001_revf02.pdf (sintef.no)
DCU	Delayed Coking Unit								Derived gases	0.2276		Figure 7-1: Base Case 3) Block flow diagrams with main material streams; Figure 7-4: Base Case 3) Steam networks	d2_bd0839a-pr-0000-re-001_revf02.pdf (sintef.no)
DCU	Delayed Coking Unit	Derived gases	1.4784									Figure 7-4: Base Case 3) Steam network	d2_bd0839a-pr-0000-re-001_revf02.pdf (sintef.no)
DCU	Delayed Coking Unit	Electricity	0.16378									Figure 7 - 3: Base Case 3) Electricity network	d2_bd0839a-pr-0000-re-001_revf02.pdf (sintef.no)
DCU	Delayed Coking Unit											Figure 7 - 5: Base Case 3) Cooling water network	d2_bd0839a-pr-0000-re-001_revf02.pdf (sintef.no)
DCU	Delayed Coking Unit								Steam	0.0138048		Figure 7 - 6: Base Case 3) Fuel Gas/Offgas networks, 2.1 GJ/t Steam	d2_bd0839a-pr-0000-re-001_revf02.pdf (sintef.no)
DCU	Delayed Coking Unit										25		d2_bd0839a-pr-0000-re-001_revf02.pdf (sintef.no)
Sweet Shift	Sweet Shift HVR feedstock											Table 2; Table S3 81.7 t/h; Assumption 8400 h/a	Techno-economic evaluation of methanol production via gasification of vacuum residue and conventional reforming routes - ScienceDirect
Sweet Shift	Sweet Shift HVR feedstock						39.6037					Assumption 5 % price decrease as demand increases	Techno-economic evaluation of methanol production via gasification of vacuum residue and conventional reforming routes - ScienceDirect
Sweet Shift	Sweet Shift HVR feedstock											Assumption 3 % CAPEX	Techno-economic evaluation of methanol production via gasification of vacuum residue and conventional reforming routes - ScienceDirect
Sweet Shift	Sweet Shift HVR feedstock							1.18811				Assumption 3 % CAPEX	Techno-economic evaluation of methanol production via gasification of vacuum residue and conventional reforming routes - ScienceDirect
Sweet Shift	Sweet Shift HVR feedstock								MeOH	1			Techno-economic evaluation of methanol production via gasification of vacuum residue and conventional reforming routes - ScienceDirect
Sweet Shift	Sweet Shift HVR feedstock					0.25			CO2 Captured	1		Table 2, 80% capture rate	Techno-economic evaluation of methanol production via gasification of vacuum residue and conventional reforming routes - ScienceDirect
Sweet Shift	Sweet Shift HVR feedstock												Techno-economic evaluation of methanol production via gasification of vacuum residue and conventional reforming routes - ScienceDirect
Sweet Shift	Sweet Shift HVR feedstock			Bitumen	31.9112							Carbon balance	Techno-economic evaluation of methanol production via gasification of vacuum residue and conventional reforming routes - ScienceDirect
Sweet Shift	Sweet Shift HVR feedstock	Electricity	8.29083									Assumption Electricity as main energy carrier; Based on efficiency of 45.7 % (Table 2, LHV_MeOH of 19.9 and Feedstock based on carbon balance	Techno-economic evaluation of methanol production via gasification of vacuum residue and conventional reforming routes - ScienceDirect
Sweet Shift	Sweet Shift Heavy fuel oil feedstock											Table 2, assumption Heavy fuel oil can be used similar to Vacuum residue; 10% Less expensive as Gas cleaning is easier and higher H to C ratio; Table S3 81.7 t/h; Assumption 8400 h/a	Techno-economic evaluation of methanol production via gasification of vacuum residue and conventional reforming routes - ScienceDirect
Sweet Shift	Sweet Shift Heavy fuel oil feedstock						35.6433					Assumption 5 % price decrease as demand increases	Techno-economic evaluation of methanol production via gasification of vacuum residue and conventional reforming routes - ScienceDirect
Sweet Shift	Sweet Shift Heavy fuel oil feedstock											Assumption 3 % CAPEX	Techno-economic evaluation of methanol production via gasification of vacuum residue and conventional reforming routes - ScienceDirect
Sweet Shift	Sweet Shift Heavy fuel oil feedstock							1.0693				Assumption 3 % CAPEX	Techno-economic evaluation of methanol production via gasification of vacuum residue and conventional reforming routes - ScienceDirect
Sweet Shift	Sweet Shift Heavy fuel oil feedstock								MeOH	1			Techno-economic evaluation of methanol production via gasification of vacuum residue and conventional reforming routes - ScienceDirect
Sweet Shift	Sweet Shift Heavy fuel oil feedstock										25	Assumption	Techno-economic evaluation of methanol production via gasification of vacuum residue and conventional reforming routes - ScienceDirect
Sweet Shift	Sweet Shift Heavy fuel oil feedstock					0.2			CO2 Captured	0.8		Carbon balance	Techno-economic evaluation of methanol production via gasification of vacuum residue and conventional reforming routes - ScienceDirect
Sweet Shift	Sweet Shift Heavy fuel oil feedstock			Heavy fuel oil	29.7754							Table 2, Assumption: 10% higher carbon efficiency	Techno-economic evaluation of methanol production via gasification of vacuum residue and conventional reforming routes - ScienceDirect
Sweet Shift	Sweet Shift Heavy fuel oil feedstock	Electricity	3.66997									Assumption 10% higher efficiency compared to VR-Gasification; Assumption Electricity as main energy carrier; Based on efficiency of 45.7 % (Table 2, LHV_MeOH of 19.9 and Feedstock based on carbon balance	Techno-economic evaluation of methanol production via gasification of vacuum residue and conventional reforming routes - ScienceDirect
Sweet Shift	Sweet Shift Light fuel oil feedstock											Table 2, assumption Heavy fuel oil can be used similar to Vacuum residue; 10% Less expensive as Gas cleaning is easier and higher H to C ratio; Table S3 81.7 t/h; Assumption 8400 h/a	Techno-economic evaluation of methanol production via gasification of vacuum residue and conventional reforming routes - ScienceDirect
Sweet Shift	Sweet Shift Light fuel oil feedstock						35.6433					Assumption 5 % price decrease as demand increases	Techno-economic evaluation of methanol production via gasification of vacuum residue and conventional reforming routes - ScienceDirect
Sweet Shift	Sweet Shift Light fuel oil feedstock											Assumption 3 % CAPEX	Techno-economic evaluation of methanol production via gasification of vacuum residue and conventional reforming routes - ScienceDirect
Sweet Shift	Sweet Shift Light fuel oil feedstock							1.0693				Assumption 3 % CAPEX	Techno-economic evaluation of methanol production via gasification of vacuum residue and conventional reforming routes - ScienceDirect
Sweet Shift	Sweet Shift Light fuel oil feedstock								MeOH	1			Techno-economic evaluation of methanol production via gasification of vacuum residue and conventional reforming routes - ScienceDirect
Sweet Shift	Sweet Shift Light fuel oil feedstock										25	Assumption	Techno-economic evaluation of methanol production via gasification of vacuum residue and conventional reforming routes - ScienceDirect
Sweet Shift	Sweet Shift Light fuel oil feedstock					0.236559			CO2 Captured	0.8		Carbon balance	Techno-economic evaluation of methanol production via gasification of vacuum residue and conventional reforming routes - ScienceDirect
Sweet Shift	Sweet Shift Light fuel oil feedstock			Light fuel oil	32.0689							Table 2, Assumption: 10% higher carbon efficiency	Techno-economic evaluation of methanol production via gasification of vacuum residue and conventional reforming routes - ScienceDirect
Sweet Shift	Sweet Shift Light fuel oil feedstock	Electricity	1.37646									Assumption 10% higher efficiency compared to VR-Gasification; Assumption Electricity as main energy carrier; Based on efficiency of 45.7 % (Table 2, LHV_MeOH of 19.9 and Feedstock based on carbon balance	Techno-economic evaluation of methanol production via gasification of vacuum residue and conventional reforming routes - ScienceDirect
Sweet Shift	Sweet Shift Naphtha feedstock											Table 2, assumption Heavy fuel oil can be used similar to Vacuum residue; 10% Less expensive as Gas cleaning is easier and higher H to C ratio; Table S3 81.7 t/h; Assumption 8400 h/a	Techno-economic evaluation of methanol production via gasification of vacuum residue and conventional reforming routes - ScienceDirect
Sweet Shift	Sweet Shift Naphtha feedstock						35.6433					Assumption 5 % price decrease as demand increases	Techno-economic evaluation of methanol production via gasification of vacuum residue and conventional reforming routes - ScienceDirect
Sweet Shift	Sweet Shift Naphtha feedstock											Assumption 3 % Capex	Techno-economic evaluation of methanol production via gasification of vacuum residue and conventional reforming routes - ScienceDirect
Sweet Shift	Sweet Shift Naphtha feedstock							1.0693				Assumption 3 % Capex	Techno-economic evaluation of methanol production via gasification of vacuum residue and conventional reforming routes - ScienceDirect
Sweet Shift	Sweet Shift Naphtha feedstock								MeOH	1			Techno-economic evaluation of methanol production via gasification of vacuum residue and conventional reforming routes - ScienceDirect
Sweet Shift	Sweet Shift Naphtha feedstock										25	Assumption	Techno-economic evaluation of methanol production via gasification of vacuum residue and conventional reforming routes - ScienceDirect
Sweet Shift	Sweet Shift Naphtha feedstock					0.2			CO2 Captured	0.81813		Table 2, Assumption: 10% higher carbon efficiency	Techno-economic evaluation of methanol production via gasification of vacuum residue and conventional reforming routes - ScienceDirect
Sweet Shift	Sweet Shift Naphtha feedstock			Naphtha	32.3752							Carbon balance	Techno-economic evaluation of methanol production via gasification of vacuum residue and conventional reforming routes - ScienceDirect
Sweet Shift	Sweet Shift Naphtha feedstock	Electricity	1.07021									Assumption 10% higher efficiency compared to VR-Gasification; Assumption Electricity as main energy carrier; Based on efficiency of 45.7 % (Table 2, LHV_MeOH of 19.9 and Feedstock based on carbon balance	Techno-economic evaluation of methanol production via gasification of vacuum residue and conventional reforming routes - ScienceDirect
Sweet Shift	Sweet Shift Gasoline feedstock											Table 2, assumption Heavy fuel oil can be used similar to Vacuum residue; 10% Less expensive as gas cleaning is easier and higher H to C ratio; Table S3 81.7 t/h; Assumption 8400 h/a	Techno-economic evaluation of methanol production via gasification of vacuum residue and conventional reforming routes - ScienceDirect
Sweet Shift	Sweet Shift Gasoline feedstock						35.6433					Assumption 5 % price decrease as demand increases	Techno-economic evaluation of methanol production via gasification of vacuum residue and conventional reforming routes - ScienceDirect
Sweet Shift	Sweet Shift Gasoline feedstock											Assumption 3 % CAPEX	Techno-economic evaluation of methanol production via gasification of vacuum residue and conventional reforming routes - ScienceDirect
Sweet Shift	Sweet Shift Gasoline feedstock							1.0693				Assumption 3 % CAPEX	Techno-economic evaluation of methanol production via gasification of vacuum residue and conventional reforming routes - ScienceDirect
Sweet Shift	Sweet Shift Gasoline feedstock								MeOH	1			Techno-economic evaluation of methanol production via gasification of vacuum residue and conventional reforming routes - ScienceDirect
Sweet Shift	Sweet Shift Gasoline feedstock										25	Assumption	Techno-economic evaluation of methanol production via gasification of vacuum residue and conventional reforming routes - ScienceDirect
Sweet Shift	Sweet Shift Gasoline feedstock					0.2			CO2 Captured	0.826007		Table 2, Assumption: 10% higher carbon efficiency	Techno-economic evaluation of methanol production via gasification of vacuum residue and conventional reforming routes - ScienceDirect
Sweet Shift	Sweet Shift Gasoline feedstock			Gasoline	32.5082							Carbon balance	Techno-economic evaluation of methanol production via gasification of vacuum residue and conventional reforming routes - ScienceDirect
Sweet Shift	Sweet Shift Gasoline feedstock	Electricity	0.937159									Assumption 10% higher efficiency compared to VR-Gasification; Assumption Electricity as main energy carrier; Based on efficiency of 45.7 % (Table 2, LHV_MeOH of 19.9 and Feedstock based on carbon balance	Techno-economic evaluation of methanol production via gasification of vacuum residue and conventional reforming routes - ScienceDirect
Crude oil catalytic cracking	Crude oil catalytic cracking	Electricity	2.17336	Crude	41.85				Steam	0.0462476		Table 2 + energy demand for cc from https://onlinelibrary.wiley.com/doi/10.1002/cjce.24024 CCS 221 MW for 567 t CO2/h from petcoke; 95 capture rate, 2.1 GJ/t Steam	Produce petrochemicals directly from crude oil catalytic cracking, a techno-economic analysis and life cycle society-environment assessment - ScienceDirect
Crude oil catalytic cracking	Crude oil catalytic cracking								Natural Gas	0.0415863		Table 1, 86.1 % Conversion Rate	Produce petrochemicals directly from crude oil catalytic cracking, a techno-economic analysis and life cycle society-environment assessment - ScienceDirect
Crude oil catalytic cracking	Crude oil catalytic cracking								Olefines	0.341645		Table 1, Ethylene, propylene, C4	Produce petrochemicals directly from crude oil catalytic cracking, a techno-economic analysis and life cycle society-environment assessment - ScienceDirect
Crude oil catalytic cracking	Crude oil catalytic cracking								Derived gases	0.0554484		Table 1, Ethane, propane	Produce petrochemicals directly from crude oil catalytic cracking, a techno-economic analysis and life cycle society-environment assessment - ScienceDirect
Crude oil catalytic cracking	Crude oil catalytic cracking								Gasoline	0.240133		Table 1	Produce petrochemicals directly from crude oil catalytic cracking, a techno-economic analysis and life cycle society-environment assessment - ScienceDirect
Crude oil catalytic cracking	Crude oil catalytic cracking								Light fuel oil	0.0828282		Table 1	Produce petrochemicals directly from crude oil catalytic cracking, a techno-economic analysis and life cycle society-environment assessment - ScienceDirect
Crude oil catalytic cracking	Crude oil catalytic cracking								Petroleum coke	0.0562233		Table 1	Produce petrochemicals directly from crude oil catalytic cracking, a techno-economic analysis and life cycle society-environment assessment - ScienceDirect
Crude oil catalytic cracking	Crude oil catalytic cracking								Bitumen	0.0368508		Table 1, Slurry	Produce petrochemicals directly from crude oil catalytic cracking, a techno-economic analysis and life cycle society-environment assessment - ScienceDirect
Crude oil catalytic cracking	Crude oil catalytic cracking					0.0109083			CO2 Captured	0.207258		Fig. 9 Based on coke loss, from https://onlinelibrary.wiley.com/doi/10.1002/cjce.24024 CCS 221 MW for 567 t CO2/h from petcoke; 95 capture rate	Produce petrochemicals directly from crude oil catalytic cracking, a techno-economic analysis and life cycle society-environment assessment - ScienceDirect
Crude oil catalytic cracking	Crude oil catalytic cracking						3795.91					Fig 10 multiplied with 15 years lifetime +cost for cc from https://onlinelibrary.wiley.com/doi/10.1002/cjce.24024 table 8: 140 Million USD, with 0.92 EUR/USD, for 567 t CO2/h from petcoke; 95 % capture rate, with 8400 FLH	Produce petrochemicals directly from crude oil catalytic cracking, a techno-economic analysis and life cycle society-environment assessment - ScienceDirect
Crude oil catalytic cracking	Crude oil catalytic cracking							75.9182				Assumption 2 % of capex in line with Fig 10	Produce petrochemicals directly from crude oil catalytic cracking, a techno-economic analysis and life cycle society-environment assessment - ScienceDirect
Crude oil catalytic cracking	Crude oil catalytic cracking										15	S11	Produce petrochemicals directly from crude oil catalytic cracking, a techno-economic analysis and life cycle society-environment assessment - ScienceDirect
Crude oil catalytic cracking	Crude oil catalytic cracking	Electricity	2.17336	Crude	41.85				Steam	0.0462476		Table 2 + energy demand for cc from https://onlinelibrary.wiley.com/doi/10.1002/cjce.24024 CCS 221 MW for 567 t CO2/h from petcoke; 95 capture rate, 2.1 GJ/t Steam	Produce petrochemicals directly from crude oil catalytic cracking, a techno-economic analysis and life cycle society-environment assessment - ScienceDirect
Crude oil catalytic cracking	Crude oil catalytic cracking								Natural Gas	0.0415863		Table 1, 86.1 % Conversion Rate	Produce petrochemicals directly from crude oil catalytic cracking, a techno-economic analysis and life cycle society-environment assessment - ScienceDirect
Crude oil catalytic cracking	Crude oil catalytic cracking								Olefines	0.341645		Table 1, Ethylene, propylene, C4	Produce petrochemicals directly from crude oil catalytic cracking, a techno-economic analysis and life cycle society-environment assessment - ScienceDirect
Crude oil catalytic cracking	Crude oil catalytic cracking								Derived gases	0.0554484		Table 1, Ethane, propane	Produce petrochemicals directly from crude oil catalytic cracking, a techno-economic analysis and life cycle society-environment assessment - ScienceDirect
Crude oil catalytic cracking	Crude oil catalytic cracking								Naphtha	0.240133		Table 1	Produce petrochemicals directly from crude oil catalytic cracking, a techno-economic analysis and life cycle society-environment assessment - ScienceDirect
Crude oil catalytic cracking	Crude oil catalytic cracking								Light fuel oil	0.0828282		Table 1	Produce petrochemicals directly from crude oil catalytic cracking, a techno-economic analysis and life cycle society-environment assessment - ScienceDirect
Crude oil catalytic cracking	Crude oil catalytic cracking								Petroleum coke	0.0562233		Table 1	Produce petrochemicals directly from crude oil catalytic cracking, a techno-economic analysis and life cycle society-environment assessment - ScienceDirect
Crude oil catalytic cracking	Crude oil catalytic cracking								Bitumen	0.0368508		Table 1, Slurry	Produce petrochemicals directly from crude oil catalytic cracking, a techno-economic analysis and life cycle society-environment assessment - ScienceDirect
Crude oil catalytic cracking	Crude oil catalytic cracking					0.0109083			CO2 Captured	0.207258		Fig. 9 Based on coke loss, from https://onlinelibrary.wiley.com/doi/10.1002/cjce.24024 CCS 221 MW for 567 t CO2/h from petcoke; 95 capture rate	Produce petrochemicals directly from crude oil catalytic cracking, a techno-economic analysis and life cycle society-environment assessment - ScienceDirect
Crude oil catalytic cracking	Crude oil catalytic cracking						3795.91					Fig 10 multiplied with 15 years lifetime +cost for cc from https://onlinelibrary.wiley.com/doi/10.1002/cjce.24024 table 8: 140 Million USD, with 0.92 EUR/USD, for 567 t CO2/h from petcoke; 95 % capture rate, with 8400 FLH	Produce petrochemicals directly from crude oil catalytic cracking, a techno-economic analysis and life cycle society-environment assessment - ScienceDirect
Crude oil catalytic cracking	Crude oil catalytic cracking							75.9182				Assumption 2 % of capex in line with Fig 10	Produce petrochemicals directly from crude oil catalytic cracking, a techno-economic analysis and life cycle society-environment assessment - ScienceDirect
Crude oil catalytic cracking	Crude oil catalytic cracking										15	S11	Produce petrochemicals directly from crude oil catalytic cracking, a techno-economic analysis and life cycle society-environment assessment - ScienceDirect
Electrical Steam Cracker	Electrical Steam Cracker Naptha feedstock	Electricity	15.7673									S19 Assumption 30 % reduced heat demand through electrification according to experts	https://doi.org/10.1039/D3EE00478C
Electrical Steam Cracker	Electrical Steam Cracker Naptha feedstock											S19	https://doi.org/10.1039/D3EE00478C
Electrical Steam Cracker	Electrical Steam Cracker Naptha feedstock											S19	https://doi.org/10.1039/D3EE00478C
Electrical Steam Cracker	Electrical Steam Cracker Naptha feedstock			Naphtha	148.32							S19	https://doi.org/10.1039/D3EE00478C
Electrical Steam Cracker	Electrical Steam Cracker Naptha feedstock					0						S19	https://doi.org/10.1039/D3EE00478C
Electrical Steam Cracker	Electrical Steam Cracker Naptha feedstock											S16 + 20% for electrifiication	https://doi.org/10.1039/D3EE00478C, The Future of Petrochemicals – Analysis - IEA, The potential of direct steam cracker electrification and carbon capture & utilization via oxidative coupling of methane as decarbonization strategies for ethylene production - ScienceDirect; https://doi.org/10.1016/j.enconman.2022.116256; https://doi.org/10.1021/acs.est.3c05880
Electrical Steam Cracker	Electrical Steam Cracker Naptha feedstock						3683.9					S16 + 10% for electrifiication	https://doi.org/10.1039/D3EE00478C, The Future of Petrochemicals – Analysis - IEA, The potential of direct steam cracker electrification and carbon capture & utilization via oxidative coupling of methane as decarbonization strategies for ethylene production - ScienceDirect; https://doi.org/10.1016/j.enconman.2022.116256; https://doi.org/10.1021/acs.est.3c05880
Electrical Steam Cracker	Electrical Steam Cracker Naptha feedstock											S16	https://doi.org/10.1039/D3EE00478C, The Future of Petrochemicals – Analysis - IEA, The potential of direct steam cracker electrification and carbon capture & utilization via oxidative coupling of methane as decarbonization strategies for ethylene production - ScienceDirect; https://doi.org/10.1016/j.enconman.2022.116256; https://doi.org/10.1021/acs.est.3c05880
Electrical Steam Cracker	Electrical Steam Cracker Naptha feedstock							92.0975				S16	https://doi.org/10.1039/D3EE00478C, The Future of Petrochemicals – Analysis - IEA, The potential of direct steam cracker electrification and carbon capture & utilization via oxidative coupling of methane as decarbonization strategies for ethylene production - ScienceDirect; https://doi.org/10.1016/j.enconman.2022.116256; https://doi.org/10.1021/acs.est.3c05880
Electrical Steam Cracker	Electrical Steam Cracker Naptha feedstock								Olefines	1.6065		S13, Assumption 5% increased yield due to electrification	https://doi.org/10.1039/D3EE00478C
Electrical Steam Cracker	Electrical Steam Cracker Naptha feedstock								Aromatics	0.448875		S13 Assumption 5% increased yield due to electrification	https://doi.org/10.1039/D3EE00478C
Electrical Steam Cracker	Electrical Steam Cracker Naptha feedstock								Derived gases	0.63		S13	https://doi.org/10.1039/D3EE00478C
Electrical Steam Cracker	Electrical Steam Cracker Naptha feedstock								Hydrogen	0.0525		S13 Assumption 5% increased yield due to electrification	https://doi.org/10.1039/D3EE00478C
Electrical Steam Cracker	Electrical Steam Cracker Naptha feedstock										20	S16, Assumption lower lifetime of electric equipment	https://doi.org/10.1039/D3EE00478C
CRF Electrified	Naphtha Catalytic Reforming Electrified	Electricity	5.4305									S9, Assumption 10% efficiency gain through electrification	https://doi.org/10.1016/j.jclepro.2020.123525
CRF Electrified	Naphtha Catalytic Reforming Electrified	Steam	7.341									S9, Assumption 10% efficiency gain through electrification	https://doi.org/10.1016/j.jclepro.2020.123525
CRF Electrified	Naphtha Catalytic Reforming Electrified			Naphtha	147.742							S9, with LHV of 42.7	https://doi.org/10.1016/j.jclepro.2020.123525
CRF Electrified	Naphtha Catalytic Reforming Electrified								Aromatics	1.723		S9	https://doi.org/10.1016/j.jclepro.2020.123525
CRF Electrified	Naphtha Catalytic Reforming Electrified								Hydrogen	0.35		S9	https://doi.org/10.1016/j.jclepro.2020.123525
CRF Electrified	Naphtha Catalytic Reforming Electrified								Derived gases	0.168		S9 Dry gas, LPG	https://doi.org/10.1016/j.jclepro.2020.123525
CRF Electrified	Naphtha Catalytic Reforming Electrified								Light fuel oil	0.555		S9 C9+	https://doi.org/10.1016/j.jclepro.2020.123525
CRF Electrified	Naphtha Catalytic Reforming Electrified								Gasoline	0.501		S9 C6+ Alkane	https://doi.org/10.1016/j.jclepro.2020.123525
CRF Electrified	Naphtha Catalytic Reforming Electrified								Steam	0.846667		S9, 2.1 GJ/t Steam	https://doi.org/10.1016/j.jclepro.2020.123525
CRF Electrified	Naphtha Catalytic Reforming Electrified						371.937					1318 kt feed per year; with 0.92 EUR/$; in line with https://doi.org/10.1039/D3EE00478C	deliverable-d3_reference-plants-economic-evaluation_final_code.pdf
CRF Electrified	Naphtha Catalytic Reforming Electrified							14.8775				4% of CAPEX	https://doi.org/10.1039/D3EE00478C
Electrical Steam Cracker	Electrical Steam Cracker Light fuel oil feedstock	Electricity	27.284									Table 34; Assumption 20% reduced Energy demand through electrification;	JRC Publications Repository - Energy efficiency and GHG emissions: Prospective scenarios for the Chemical and Petrochemical Industry
Electrical Steam Cracker	Electrical Steam Cracker Light fuel oil feedstock											S19	https://doi.org/10.1039/D3EE00478C
Electrical Steam Cracker	Electrical Steam Cracker Light fuel oil feedstock											S19	https://doi.org/10.1039/D3EE00478C
Electrical Steam Cracker	Electrical Steam Cracker Light fuel oil feedstock			Light fuel oil	161.59							S19; https://publications.jrc.ec.europa.eu/repository/handle/JRC105767 Table 32: 2.07 t Gasoil/t HVC	https://doi.org/10.1039/D3EE00478C
Electrical Steam Cracker	Electrical Steam Cracker Light fuel oil feedstock											S19	https://doi.org/10.1039/D3EE00478C
Electrical Steam Cracker	Electrical Steam Cracker Light fuel oil feedstock											S16 + 20% for electrifiication	https://doi.org/10.1039/D3EE00478C, The Future of Petrochemicals – Analysis - IEA, The potential of direct steam cracker electrification and carbon capture & utilization via oxidative coupling of methane as decarbonization strategies for ethylene production - ScienceDirect; https://doi.org/10.1016/j.enconman.2022.116256; https://doi.org/10.1021/acs.est.3c05880
Electrical Steam Cracker	Electrical Steam Cracker Light fuel oil feedstock						3683.9					S16 + 10% for electrifiication	https://doi.org/10.1039/D3EE00478C, The Future of Petrochemicals – Analysis - IEA, The potential of direct steam cracker electrification and carbon capture & utilization via oxidative coupling of methane as decarbonization strategies for ethylene production - ScienceDirect; https://doi.org/10.1016/j.enconman.2022.116256; https://doi.org/10.1021/acs.est.3c05880
Electrical Steam Cracker	Electrical Steam Cracker Light fuel oil feedstock											S16	https://doi.org/10.1039/D3EE00478C, The Future of Petrochemicals – Analysis - IEA, The potential of direct steam cracker electrification and carbon capture & utilization via oxidative coupling of methane as decarbonization strategies for ethylene production - ScienceDirect; https://doi.org/10.1016/j.enconman.2022.116256; https://doi.org/10.1021/acs.est.3c05880
Electrical Steam Cracker	Electrical Steam Cracker Light fuel oil feedstock							92.0975				S16	https://doi.org/10.1039/D3EE00478C, The Future of Petrochemicals – Analysis - IEA, The potential of direct steam cracker electrification and carbon capture & utilization via oxidative coupling of methane as decarbonization strategies for ethylene production - ScienceDirect; https://doi.org/10.1016/j.enconman.2022.116256; https://doi.org/10.1021/acs.est.3c05880
Electrical Steam Cracker	Electrical Steam Cracker Light fuel oil feedstock								Olefines	1.44585		S13, Assumption 5% increased yield due to electrification; 10% decreased olefine yield through feedstcok switch	https://doi.org/10.1039/D3EE00478C
Electrical Steam Cracker	Electrical Steam Cracker Light fuel oil feedstock								Aromatics	0.448875		S13 Assumption 5% increased yield due to electrification	https://doi.org/10.1039/D3EE00478C
Electrical Steam Cracker	Electrical Steam Cracker Light fuel oil feedstock								Derived gases	0.63		S13	https://doi.org/10.1039/D3EE00478C
Electrical Steam Cracker	Electrical Steam Cracker Light fuel oil feedstock								Hydrogen	0.0525		S13 Assumption 5% increased yield due to electrification	https://doi.org/10.1039/D3EE00478C
Electrical Steam Cracker	Electrical Steam Cracker Light fuel oil feedstock										20	S16, Assumption lower lifetime of electric equipment	https://doi.org/10.1039/D3EE00478C
Electrical Steam Cracker	Electrical Steam Cracker Heavy fuel oil feedstock	Electricity	27.284									Table 34; Assumption 20% reduced Energy demand through electrification;	JRC Publications Repository - Energy efficiency and GHG emissions: Prospective scenarios for the Chemical and Petrochemical Industry
Electrical Steam Cracker	Electrical Steam Cracker Heavy fuel oil feedstock											S19	https://doi.org/10.1039/D3EE00478C
Electrical Steam Cracker	Electrical Steam Cracker Heavy fuel oil feedstock											S19	https://doi.org/10.1039/D3EE00478C
Electrical Steam Cracker	Electrical Steam Cracker Heavy fuel oil feedstock			Heavy fuel oil	161.59							S19; https://publications.jrc.ec.europa.eu/repository/handle/JRC105767 Table 32: 2.07 t Gasoil/t HVC	https://doi.org/10.1039/D3EE00478C
Electrical Steam Cracker	Electrical Steam Cracker Heavy fuel oil feedstock											S19	https://doi.org/10.1039/D3EE00478C
Electrical Steam Cracker	Electrical Steam Cracker Heavy fuel oil feedstock											S16 + 20% for electrifiication	https://doi.org/10.1039/D3EE00478C, The Future of Petrochemicals – Analysis - IEA, The potential of direct steam cracker electrification and carbon capture & utilization via oxidative coupling of methane as decarbonization strategies for ethylene production - ScienceDirect; https://doi.org/10.1016/j.enconman.2022.116256; https://doi.org/10.1021/acs.est.3c05880
Electrical Steam Cracker	Electrical Steam Cracker Heavy fuel oil feedstock						3683.9					S16 + 10% for electrifiication	https://doi.org/10.1039/D3EE00478C, The Future of Petrochemicals – Analysis - IEA, The potential of direct steam cracker electrification and carbon capture & utilization via oxidative coupling of methane as decarbonization strategies for ethylene production - ScienceDirect; https://doi.org/10.1016/j.enconman.2022.116256; https://doi.org/10.1021/acs.est.3c05880
Electrical Steam Cracker	Electrical Steam Cracker Heavy fuel oil feedstock											S16	https://doi.org/10.1039/D3EE00478C, The Future of Petrochemicals – Analysis - IEA, The potential of direct steam cracker electrification and carbon capture & utilization via oxidative coupling of methane as decarbonization strategies for ethylene production - ScienceDirect; https://doi.org/10.1016/j.enconman.2022.116256; https://doi.org/10.1021/acs.est.3c05880
Electrical Steam Cracker	Electrical Steam Cracker Heavy fuel oil feedstock							92.0975				S16	https://doi.org/10.1039/D3EE00478C, The Future of Petrochemicals – Analysis - IEA, The potential of direct steam cracker electrification and carbon capture & utilization via oxidative coupling of methane as decarbonization strategies for ethylene production - ScienceDirect; https://doi.org/10.1016/j.enconman.2022.116256; https://doi.org/10.1021/acs.est.3c05880
Electrical Steam Cracker	Electrical Steam Cracker Heavy fuel oil feedstock								Olefines	1.44585		S13, Assumption 5% increased yield due to electrification; 10% decreased olefine yield through feedstcok switch	https://doi.org/10.1039/D3EE00478C
Electrical Steam Cracker	Electrical Steam Cracker Heavy fuel oil feedstock								Aromatics	0.448875		S13 Assumption 5% increased yield due to electrification	https://doi.org/10.1039/D3EE00478C
Electrical Steam Cracker	Electrical Steam Cracker Heavy fuel oil feedstock								Derived gases	0.63		S13	https://doi.org/10.1039/D3EE00478C
Electrical Steam Cracker	Electrical Steam Cracker Heavy fuel oil feedstock								Hydrogen	0.0525		S13 Assumption 5% increased yield due to electrification	https://doi.org/10.1039/D3EE00478C
Electrical Steam Cracker	Electrical Steam Cracker Heavy fuel oil feedstock										20	S16, Assumption lower lifetime of electric equipment	https://doi.org/10.1039/D3EE00478C
Electrical Steam Cracker	Electrical Steam Cracker Kerosene feedstock	Electricity	17.3282									S19 Assumption 30 % reduced heat demand through electrification according to experts; Assumption: 10% increased energy demand due to fuel switch, 5% decreased olefine yield	https://doi.org/10.1039/D3EE00478C
Electrical Steam Cracker	Electrical Steam Cracker Kerosene feedstock											S19	https://doi.org/10.1039/D3EE00478C
Electrical Steam Cracker	Electrical Steam Cracker Kerosene feedstock											S19	https://doi.org/10.1039/D3EE00478C
Electrical Steam Cracker	Electrical Steam Cracker Kerosene feedstock			Jet fuel	148.32							S19	https://doi.org/10.1039/D3EE00478C
Electrical Steam Cracker	Electrical Steam Cracker Kerosene feedstock											S19	https://doi.org/10.1039/D3EE00478C
Electrical Steam Cracker	Electrical Steam Cracker Kerosene feedstock											S16 + 20% for electrifiication	https://doi.org/10.1039/D3EE00478C, The Future of Petrochemicals – Analysis - IEA, The potential of direct steam cracker electrification and carbon capture & utilization via oxidative coupling of methane as decarbonization strategies for ethylene production - ScienceDirect; https://doi.org/10.1016/j.enconman.2022.116256; https://doi.org/10.1021/acs.est.3c05880
Electrical Steam Cracker	Electrical Steam Cracker Kerosene feedstock						3683.9					S16 + 10% for electrifiication	https://doi.org/10.1039/D3EE00478C, The Future of Petrochemicals – Analysis - IEA, The potential of direct steam cracker electrification and carbon capture & utilization via oxidative coupling of methane as decarbonization strategies for ethylene production - ScienceDirect; https://doi.org/10.1016/j.enconman.2022.116256; https://doi.org/10.1021/acs.est.3c05880
Electrical Steam Cracker	Electrical Steam Cracker Kerosene feedstock											S16	https://doi.org/10.1039/D3EE00478C, The Future of Petrochemicals – Analysis - IEA, The potential of direct steam cracker electrification and carbon capture & utilization via oxidative coupling of methane as decarbonization strategies for ethylene production - ScienceDirect; https://doi.org/10.1016/j.enconman.2022.116256; https://doi.org/10.1021/acs.est.3c05880
Electrical Steam Cracker	Electrical Steam Cracker Kerosene feedstock							92.0975				S16	https://doi.org/10.1039/D3EE00478C, The Future of Petrochemicals – Analysis - IEA, The potential of direct steam cracker electrification and carbon capture & utilization via oxidative coupling of methane as decarbonization strategies for ethylene production - ScienceDirect; https://doi.org/10.1016/j.enconman.2022.116256; https://doi.org/10.1021/acs.est.3c05880
Electrical Steam Cracker	Electrical Steam Cracker Kerosene feedstock								Olefines	1.52618		S13, Assumption 5% increased yield due to electrification; 5% decreased olefine yield through feedstcok switch	https://doi.org/10.1039/D3EE00478C
Electrical Steam Cracker	Electrical Steam Cracker Kerosene feedstock								Aromatics	0.448875		S13 Assumption 5% increased yield due to electrification	https://doi.org/10.1039/D3EE00478C
Electrical Steam Cracker	Electrical Steam Cracker Kerosene feedstock								Derived gases	0.63		S13	https://doi.org/10.1039/D3EE00478C
Electrical Steam Cracker	Electrical Steam Cracker Kerosene feedstock								Hydrogen	0.0525		S13 Assumption 5% increased yield due to electrification	https://doi.org/10.1039/D3EE00478C
Electrical Steam Cracker	Electrical Steam Cracker Kerosene feedstock										20	S16, Assumption lower lifetime of electric equipment	https://doi.org/10.1039/D3EE00478C
Electrical Steam Cracker	Electrical Steam Cracker Gasoline feedstock	Electricity	15.7673									S19 Assumption 30 % reduced heat demand through electrification according to experts	https://doi.org/10.1039/D3EE00478C
Electrical Steam Cracker	Electrical Steam Cracker Gasoline feedstock											S19	https://doi.org/10.1039/D3EE00478C
Electrical Steam Cracker	Electrical Steam Cracker Gasoline feedstock											S19	https://doi.org/10.1039/D3EE00478C
Electrical Steam Cracker	Electrical Steam Cracker Gasoline feedstock			Gasoline	148.32							S19; Assumption Gasoline instead of Naphtha	https://doi.org/10.1039/D3EE00478C
Electrical Steam Cracker	Electrical Steam Cracker Gasoline feedstock					0						S19	https://doi.org/10.1039/D3EE00478C
Electrical Steam Cracker	Electrical Steam Cracker Gasoline feedstock											S16 + 20% for electrifiication	https://doi.org/10.1039/D3EE00478C, The Future of Petrochemicals – Analysis - IEA, The potential of direct steam cracker electrification and carbon capture & utilization via oxidative coupling of methane as decarbonization strategies for ethylene production - ScienceDirect; https://doi.org/10.1016/j.enconman.2022.116256; https://doi.org/10.1021/acs.est.3c05880
Electrical Steam Cracker	Electrical Steam Cracker Gasoline feedstock						3683.9					S16 + 10% for electrifiication	https://doi.org/10.1039/D3EE00478C, The Future of Petrochemicals – Analysis - IEA, The potential of direct steam cracker electrification and carbon capture & utilization via oxidative coupling of methane as decarbonization strategies for ethylene production - ScienceDirect; https://doi.org/10.1016/j.enconman.2022.116256; https://doi.org/10.1021/acs.est.3c05880
Electrical Steam Cracker	Electrical Steam Cracker Gasoline feedstock											S16	https://doi.org/10.1039/D3EE00478C, The Future of Petrochemicals – Analysis - IEA, The potential of direct steam cracker electrification and carbon capture & utilization via oxidative coupling of methane as decarbonization strategies for ethylene production - ScienceDirect; https://doi.org/10.1016/j.enconman.2022.116256; https://doi.org/10.1021/acs.est.3c05880
Electrical Steam Cracker	Electrical Steam Cracker Gasoline feedstock							92.0975				S16	https://doi.org/10.1039/D3EE00478C, The Future of Petrochemicals – Analysis - IEA, The potential of direct steam cracker electrification and carbon capture & utilization via oxidative coupling of methane as decarbonization strategies for ethylene production - ScienceDirect; https://doi.org/10.1016/j.enconman.2022.116256; https://doi.org/10.1021/acs.est.3c05880
Electrical Steam Cracker	Electrical Steam Cracker Gasoline feedstock								Olefines	1.6065		S13, Assumption 5% increased yield due to electrification	https://doi.org/10.1039/D3EE00478C
Electrical Steam Cracker	Electrical Steam Cracker Gasoline feedstock								Aromatics	0.448875		S13 Assumption 5% increased yield due to electrification	https://doi.org/10.1039/D3EE00478C
Electrical Steam Cracker	Electrical Steam Cracker Gasoline feedstock								Derived gases	0.63		S13	https://doi.org/10.1039/D3EE00478C
Electrical Steam Cracker	Electrical Steam Cracker Gasoline feedstock								Hydrogen	0.0525		S13 Assumption 5% increased yield due to electrification	https://doi.org/10.1039/D3EE00478C
Electrical Steam Cracker	Electrical Steam Cracker Gasoline feedstock										20	S16, Assumption lower lifetime of electric equipment	https://doi.org/10.1039/D3EE00478C
Steam Cracker	Steam Cracker Naphtha feedstock	Electricity	0.1584									S19	https://doi.org/10.1039/D3EE00478C
Steam Cracker	Steam Cracker Naphtha feedstock	Derived gases	22.2984									S19	https://doi.org/10.1039/D3EE00478C
Steam Cracker	Steam Cracker Naphtha feedstock											S19	https://doi.org/10.1039/D3EE00478C
Steam Cracker	Steam Cracker Naphtha feedstock			Naphtha	148.32							S19	https://doi.org/10.1039/D3EE00478C
Steam Cracker	Steam Cracker Naphtha feedstock					0						S19	https://doi.org/10.1039/D3EE00478C
Steam Cracker	Steam Cracker Naphtha feedstock											S16	https://doi.org/10.1039/D3EE00478C, The Future of Petrochemicals – Analysis - IEA, The potential of direct steam cracker electrification and carbon capture & utilization via oxidative coupling of methane as decarbonization strategies for ethylene production - ScienceDirect; https://doi.org/10.1016/j.enconman.2022.116256; https://doi.org/10.1021/acs.est.3c05880
Steam Cracker	Steam Cracker Naphtha feedstock						3349					S16	https://doi.org/10.1039/D3EE00478C, The Future of Petrochemicals – Analysis - IEA, The potential of direct steam cracker electrification and carbon capture & utilization via oxidative coupling of methane as decarbonization strategies for ethylene production - ScienceDirect; https://doi.org/10.1016/j.enconman.2022.116256; https://doi.org/10.1021/acs.est.3c05880
Steam Cracker	Steam Cracker Naphtha feedstock											S16	https://doi.org/10.1039/D3EE00478C, The Future of Petrochemicals – Analysis - IEA, The potential of direct steam cracker electrification and carbon capture & utilization via oxidative coupling of methane as decarbonization strategies for ethylene production - ScienceDirect; https://doi.org/10.1016/j.enconman.2022.116256; https://doi.org/10.1021/acs.est.3c05880
Steam Cracker	Steam Cracker Naphtha feedstock							83.725				S16	https://doi.org/10.1039/D3EE00478C, The Future of Petrochemicals – Analysis - IEA, The potential of direct steam cracker electrification and carbon capture & utilization via oxidative coupling of methane as decarbonization strategies for ethylene production - ScienceDirect; https://doi.org/10.1016/j.enconman.2022.116256; https://doi.org/10.1021/acs.est.3c05880
Steam Cracker	Steam Cracker Naphtha feedstock								Olefines	1.53		S13	https://doi.org/10.1039/D3EE00478C
Steam Cracker	Steam Cracker Naphtha feedstock								Aromatics	0.4275		S13, S15	https://doi.org/10.1039/D3EE00478C
Steam Cracker	Steam Cracker Naphtha feedstock								Derived gases	0.63		S13	https://doi.org/10.1039/D3EE00478C
Steam Cracker	Steam Cracker Naphtha feedstock								Hydrogen	0.05		S13	https://doi.org/10.1039/D3EE00478C
Steam Cracker	Steam Cracker Naphtha feedstock										25	S16	https://doi.org/10.1039/D3EE00478C
MtO	MtO	Electricity	7.74									S15-S19	https://doi.org/10.1039/D3EE00478C
MtO	MtO			MeOH	58.8168							S15-S19	https://doi.org/10.1039/D3EE00478C
MtO	MtO					0.565559						S15-S20	https://doi.org/10.1039/D3EE00478C
MtO	MtO											S15-S21	https://doi.org/10.1039/D3EE00478C
MtO	MtO						444					S15-S22	https://doi.org/10.1039/D3EE00478C
MtO	MtO											S15-S23	https://doi.org/10.1039/D3EE00478C
MtO	MtO							11.1				S15-S24	https://doi.org/10.1039/D3EE00478C
MtO	MtO								Olefines	1		S15-S25	https://doi.org/10.1039/D3EE00478C
MtO	MtO										25	S15-S26	https://doi.org/10.1039/D3EE00478C
MtA	MtA	Electricity	2.5272									S15-S19	https://doi.org/10.1039/D3EE00478C
MtA	MtA											S15-S19	https://doi.org/10.1039/D3EE00478C
MtA	MtA			MeOH	124.092								https://doi.org/10.1039/D3EE00478C
MtA	MtA					1.35682						Carbon balance	https://doi.org/10.1039/D3EE00478C
MtA	MtA												https://doi.org/10.1039/D3EE00478C
MtA	MtA						261						https://doi.org/10.1039/D3EE00478C
MtA	MtA											2.5% CAPEX	https://doi.org/10.1039/D3EE00478C
MtA	MtA							6.525				2.5% CAPEX	https://doi.org/10.1039/D3EE00478C
MtA	MtA								Aromatics	1			https://doi.org/10.1039/D3EE00478C
MtA	MtA								Derived gases	1.669		Dry Gas, LPG, Pentane, C9+	https://doi.org/10.1039/D3EE00478C
MtA	MtA								Steam	2.16171	25	2.1 GJ/t Steam	https://doi.org/10.1039/D3EE00478C
MtA	MtA					1.73928
MTF	MTF	Electricity	0.13295									Table 10, Assumption full electrification of fired heat with efficiency of 1	Kinetic Modeling and Techno-Economic Analysis of a Methanol-to-Gasoline Production Repurposed Refinery Equipment - PMC
MTF	MTF	Steam	0.791949									Table 10	Kinetic Modeling and Techno-Economic Analysis of a Methanol-to-Gasoline Production Repurposed Refinery Equipment - PMC
MTF	MTF			MeOH	59.7							With 19.9 GJ/t, Table 11	Kinetic Modeling and Techno-Economic Analysis of a Methanol-to-Gasoline Production Repurposed Refinery Equipment - PMC
MTF	MTF			Hydrogen	0.12							With 120 GJ/t, Table 11	Kinetic Modeling and Techno-Economic Analysis of a Methanol-to-Gasoline Production Repurposed Refinery Equipment - PMC
MTF	MTF											with 0.92 EUR/$ 2024, Table 12	Kinetic Modeling and Techno-Economic Analysis of a Methanol-to-Gasoline Production Repurposed Refinery Equipment - PMC
MTF	MTF						5642.26					Assumption 20 % reduction to 2050	Kinetic Modeling and Techno-Economic Analysis of a Methanol-to-Gasoline Production Repurposed Refinery Equipment - PMC
MTF	MTF							541.745				with 0.92 EUR/$ 2024, Table 11, Labor cost	Kinetic Modeling and Techno-Economic Analysis of a Methanol-to-Gasoline Production Repurposed Refinery Equipment - PMC
MTF	MTF								Gasoline	1			Kinetic Modeling and Techno-Economic Analysis of a Methanol-to-Gasoline Production Repurposed Refinery Equipment - PMC
MTF	MTF												Kinetic Modeling and Techno-Economic Analysis of a Methanol-to-Gasoline Production Repurposed Refinery Equipment - PMC
MTF	MTF										20	Table 5	Kinetic Modeling and Techno-Economic Analysis of a Methanol-to-Gasoline Production Repurposed Refinery Equipment - PMC
MTF	MTF	Electricity	5.2056									Table 5, Assumption direct electric heating	Modelling and Cost Estimation for Conversion of Green Methanol to Renewable Liquid Transport Fuels via Olefin Oligomerisation
MTF	MTF			MeOH	50.9821	0.0597983						Table 4, Carbon balance	Modelling and Cost Estimation for Conversion of Green Methanol to Renewable Liquid Transport Fuels via Olefin Oligomerisation
MTF	MTF											Table 9 with 20 years lifetime, Seems very high compared to MTO but similar as in https://pubmed.ncbi.nlm.nih.gov/38826520/	Modelling and Cost Estimation for Conversion of Green Methanol to Renewable Liquid Transport Fuels via Olefin Oligomerisation
MTF	MTF						5056					Assumption 20% reduction 2050	Modelling and Cost Estimation for Conversion of Green Methanol to Renewable Liquid Transport Fuels via Olefin Oligomerisation
MTF	MTF							614				FCOP Table 9	Modelling and Cost Estimation for Conversion of Green Methanol to Renewable Liquid Transport Fuels via Olefin Oligomerisation
MTF	MTF								Steam	3.24171		Table 5, 2.1 GJ/t Steam	Modelling and Cost Estimation for Conversion of Green Methanol to Renewable Liquid Transport Fuels via Olefin Oligomerisation
MTF	MTF								Gasoline	0.191289		Table 4	Modelling and Cost Estimation for Conversion of Green Methanol to Renewable Liquid Transport Fuels via Olefin Oligomerisation
MTF	MTF								Light fuel oil	0.504697		Table 4	Modelling and Cost Estimation for Conversion of Green Methanol to Renewable Liquid Transport Fuels via Olefin Oligomerisation
MTF	MTF								Jet fuel	0.304014		Table 4	Modelling and Cost Estimation for Conversion of Green Methanol to Renewable Liquid Transport Fuels via Olefin Oligomerisation
MTF	MTF								Derived gases	0.134244		Table 4, LPG, Fuel gas	Modelling and Cost Estimation for Conversion of Green Methanol to Renewable Liquid Transport Fuels via Olefin Oligomerisation
MTF	MTF										20		Modelling and Cost Estimation for Conversion of Green Methanol to Renewable Liquid Transport Fuels via Olefin Oligomerisation
Fischer Tropsch Synthesis	Fischer Tropsch Synthesis	Electricity	12.888										DLR 2021 https://www.now-gmbh.de/wp-content/uploads/2021/08/EPP_Abschlussbericht.pdf- -https://elib.dlr.de/142227/
Fischer Tropsch Synthesis	Fischer Tropsch Synthesis			CO2 Captured	3.1031							with 0.982 carbon efficience	DLR 2021 https://www.now-gmbh.de/wp-content/uploads/2021/08/EPP_Abschlussbericht.pdf- -https://elib.dlr.de/142227/
Fischer Tropsch Synthesis	Fischer Tropsch Synthesis			Hydrogen	53.8								DLR 2021 https://www.now-gmbh.de/wp-content/uploads/2021/08/EPP_Abschlussbericht.pdf- -https://elib.dlr.de/142227/
Fischer Tropsch Synthesis	Fischer Tropsch Synthesis											Pay for CO2 Certificate	DLR 2021 https://www.now-gmbh.de/wp-content/uploads/2021/08/EPP_Abschlussbericht.pdf- -https://elib.dlr.de/142227/
Fischer Tropsch Synthesis	Fischer Tropsch Synthesis											with 0.92 EUR/$ 2024, 13000 t/yar capacity and 378.9 M$ Investment	https://pubs.acs.org/doi/10.1021/acs.est.0c08674#
Fischer Tropsch Synthesis	Fischer Tropsch Synthesis						2145.03					Assumption: 20% price decrease until 2050 due to scale up	https://pubs.acs.org/doi/10.1021/acs.est.0c08674#
Fischer Tropsch Synthesis	Fischer Tropsch Synthesis											with 0.92 EUR/$ 2024, 13000 t/yar capacity and 20.2 M$ fixed capital cost and 7.1 M$ None energy material and utilities costs	https://pubs.acs.org/doi/10.1021/acs.est.0c08674#
Fischer Tropsch Synthesis	Fischer Tropsch Synthesis							154.232				Assumption: 20% price decrease until 2050 due to scale up	https://pubs.acs.org/doi/10.1021/acs.est.0c08674#
Fischer Tropsch Synthesis	Fischer Tropsch Synthesis								Jet fuel	0.61		Jetfuel	DLR 2021 https://www.now-gmbh.de/wp-content/uploads/2021/08/EPP_Abschlussbericht.pdf- -https://elib.dlr.de/142227/
Fischer Tropsch Synthesis	Fischer Tropsch Synthesis								HVR	0.261		Assumption: bitumen can be produced instead of Diesel +20% Electricity demand	DLR 2021 https://www.now-gmbh.de/wp-content/uploads/2021/08/EPP_Abschlussbericht.pdf- -https://elib.dlr.de/142227/
Fischer Tropsch Synthesis	Fischer Tropsch Synthesis								Gasoline	0.009		Assumption: Gasoline can be produced instead of Naphtha	DLR 2021 https://www.now-gmbh.de/wp-content/uploads/2021/08/EPP_Abschlussbericht.pdf- -https://elib.dlr.de/142227/
Fischer Tropsch Synthesis	Fischer Tropsch Synthesis										20		DLR 2021 https://www.now-gmbh.de/wp-content/uploads/2021/08/EPP_Abschlussbericht.pdf- -https://elib.dlr.de/142227/
Fischer Tropsch Synthesis	Fischer Tropsch Synthesis	Electricity	10.74										DLR 2021 https://www.now-gmbh.de/wp-content/uploads/2021/08/EPP_Abschlussbericht.pdf- -https://elib.dlr.de/142227/
Fischer Tropsch Synthesis	Fischer Tropsch Synthesis			CO2 Captured	3.1031							With 0.982 carbon efficience	DLR 2021 https://www.now-gmbh.de/wp-content/uploads/2021/08/EPP_Abschlussbericht.pdf- -https://elib.dlr.de/142227/
Fischer Tropsch Synthesis	Fischer Tropsch Synthesis			Hydrogen	53.8								DLR 2021 https://www.now-gmbh.de/wp-content/uploads/2021/08/EPP_Abschlussbericht.pdf- -https://elib.dlr.de/142227/
Fischer Tropsch Synthesis	Fischer Tropsch Synthesis												DLR 2021 https://www.now-gmbh.de/wp-content/uploads/2021/08/EPP_Abschlussbericht.pdf- -https://elib.dlr.de/142227/
Fischer Tropsch Synthesis	Fischer Tropsch Synthesis											with 0.92 EUR/$ 2024, 13000 t/year capacity and 378.9 M$ Investment	https://pubs.acs.org/doi/10.1021/acs.est.0c08674#
Fischer Tropsch Synthesis	Fischer Tropsch Synthesis						2145.03					Assumption: 20% price decrease until 2050 due to scale up	https://pubs.acs.org/doi/10.1021/acs.est.0c08674#
Fischer Tropsch Synthesis	Fischer Tropsch Synthesis											With 0.92 EUR/$ 2024, 13000 t/year capacity and 20.2 M$ fixed capital cost and 7.1 M$ None energy material and utilities costs	https://pubs.acs.org/doi/10.1021/acs.est.0c08674#
Fischer Tropsch Synthesis	Fischer Tropsch Synthesis							154.232				Assumption: 20% price decrease until 2050 due to scale up	https://pubs.acs.org/doi/10.1021/acs.est.0c08674#
Fischer Tropsch Synthesis	Fischer Tropsch Synthesis								Jet fuel	0.61		Jetfuel - nicht so unähnlich zu diesel und lfo	DLR 2021 https://www.now-gmbh.de/wp-content/uploads/2021/08/EPP_Abschlussbericht.pdf- -https://elib.dlr.de/142227/
Fischer Tropsch Synthesis	Fischer Tropsch Synthesis								Light fuel oil	0.29		Diesel	DLR 2021 https://www.now-gmbh.de/wp-content/uploads/2021/08/EPP_Abschlussbericht.pdf- -https://elib.dlr.de/142227/
Fischer Tropsch Synthesis	Fischer Tropsch Synthesis								Naphtha	0.1		Naphtha	DLR 2021 https://www.now-gmbh.de/wp-content/uploads/2021/08/EPP_Abschlussbericht.pdf- -https://elib.dlr.de/142227/
Fischer Tropsch Synthesis	Fischer Tropsch Synthesis										20		DLR 2021 https://www.now-gmbh.de/wp-content/uploads/2021/08/EPP_Abschlussbericht.pdf- -https://elib.dlr.de/142227/
Methanol Synthesis	Methanol Synthesis from hydrogen	Electricity	0.6169									S19, with 19.9 GJ/t =0.031*19.9	https://doi.org/10.1039/D3EE00478C
Methanol Synthesis	Methanol Synthesis from hydrogen	Steam	7.8804									S19, with 19.9 GJ/t =0.396*19.9	https://doi.org/10.1039/D3EE00478C
Methanol Synthesis	Methanol Synthesis from hydrogen			Hydrogen	24.079							S19, with 19.9 GJ/t =1.21*19.9	https://doi.org/10.1039/D3EE00478C
Methanol Synthesis	Methanol Synthesis from hydrogen			CO2 Captured	1.375
Methanol Synthesis	Methanol Synthesis from hydrogen											S16, with 19.9 GJ/t and 8700 h/a	https://doi.org/10.1039/D3EE00478C
Methanol Synthesis	Methanol Synthesis from hydrogen						356.446					S16, with 19.9 GJ/t and 8700 h/a	https://doi.org/10.1039/D3EE00478C
Methanol Synthesis	Methanol Synthesis from hydrogen											S16, with 19.9 GJ/t and 8700 h/a, 4% capex and 19.9899 EUR/MWh	https://doi.org/10.1039/D3EE00478C
Methanol Synthesis	Methanol Synthesis from hydrogen							14.6178				S16, with 19.9 GJ/t and 8700 h/a, 4% capex and 19.9899 EUR/MWh	https://doi.org/10.1039/D3EE00478C
Methanol Synthesis	Methanol Synthesis from hydrogen								MeOH	1			https://doi.org/10.1039/D3EE00478C
Methanol Synthesis	Methanol Synthesis from hydrogen										20	Asssumption
CHP	Derived Gases CHP			Derived gases	40							Assumption, based on Biomass CHP; small electricity only,	ZWE Capturing Materials or Carbon Final Report (europa.eu)
CHP	Derived Gases CHP					0.1144						Assumption, based on Biomass CHP; 95% capture rate (medium) and0.058 t CO2/GJ	ZWE Capturing Materials or Carbon Final Report (europa.eu)
CHP	Derived Gases CHP											Assumption, based on Biomass CHP; table 13, =95000/300	ZWE Capturing Materials or Carbon Final Report (europa.eu)
CHP	Derived Gases CHP						316.667					Assumption, based on Biomass CHP; no change	ZWE Capturing Materials or Carbon Final Report (europa.eu)
CHP	Derived Gases CHP											Assumption, based on Biomass CHP; table 13	ZWE Capturing Materials or Carbon Final Report (europa.eu)
CHP	Derived Gases CHP							12				Assumption, based on Biomass CHP; no change	ZWE Capturing Materials or Carbon Final Report (europa.eu)
CHP	Derived Gases CHP											Assumption, based on Biomass CHP;	ZWE Capturing Materials or Carbon Final Report (europa.eu)
CHP	Derived Gases CHP								CO2 Captured	2.1736		Assumption, based on Biomass CHP; 95% capture rate (medium) and 0.058 t CO2/ GJ	ZWE Capturing Materials or Carbon Final Report (europa.eu)
CHP	Derived Gases CHP								Electricity	3.14111		Assumption, based on Biomass CHP; with 0.058 t CO2/ GJ, 12% efficience (table 7), 212 kwh/tco2 (page 36) energy demand for carbon capture, 0.036 GJ/kWh
CHP	Derived Gases CHP								Steam	11.5035		Assumption, based on Biomass CHP; with 0.058 t CO2/ GJ, 35% efficiency (table 7), 670 kwh/t CO2 (page 36) energy demand for carbon capture, 0.036 GJ/kWh, 2.1 GJ/t Steam	ZWE Capturing Materials or Carbon Final Report (europa.eu)
CHP	Derived Gases CHP										20	Assumption, based on Biomass CHP; table 13	ZWE Capturing Materials or Carbon Final Report (europa.eu)
CHP	Petroleum Coke Combustion with CCS			Petroleum coke	3.38727							Table 5	Advanced petroleum coke oxy‐combustion power generation with carbon capture and sequestration: Part I—Design and techno‐economic analysis - Okeke - 2021 - The Canadian Journal of Chemical Engineering - Wiley Online Library
CHP	Petroleum Coke Combustion with CCS					0.0175122						ca 95% capture rate	Advanced petroleum coke oxy‐combustion power generation with carbon capture and sequestration: Part I—Design and techno‐economic analysis - Okeke - 2021 - The Canadian Journal of Chemical Engineering - Wiley Online Library
CHP	Petroleum Coke Combustion with CCS											POXYD, table 8, with 0,92 EUR/$	Advanced petroleum coke oxy‐combustion power generation with carbon capture and sequestration: Part I—Design and techno‐economic analysis - Okeke - 2021 - The Canadian Journal of Chemical Engineering - Wiley Online Library
CHP	Petroleum Coke Combustion with CCS						112.752	6.325				POXYD, table 8, with 0,92 EUR/$; Assumption 10% price decrease	Advanced petroleum coke oxy‐combustion power generation with carbon capture and sequestration: Part I—Design and techno‐economic analysis - Okeke - 2021 - The Canadian Journal of Chemical Engineering - Wiley Online Library
CHP	Petroleum Coke Combustion with CCS								Electricity	1		Normalized	Advanced petroleum coke oxy‐combustion power generation with carbon capture and sequestration: Part I—Design and techno‐economic analysis - Okeke - 2021 - The Canadian Journal of Chemical Engineering - Wiley Online Library
CHP	Petroleum Coke Combustion with CCS								CO2 Captured	0.332732		Ca 95% capture rate	Advanced petroleum coke oxy‐combustion power generation with carbon capture and sequestration: Part I—Design and techno‐economic analysis - Okeke - 2021 - The Canadian Journal of Chemical Engineering - Wiley Online Library
Gasif.MeOH Synthesis	Methanol Synthesis from biomass electrified	Electricity	14.8114									SyE; with electricity price of 38,49 EUR/MWH (table 7) ; 201 kt/a	https://doi.org/10.1016/j.enconman.2023.118009
Gasif.MeOH Synthesis	Methanol Synthesis from biomass electrified			Biomass	14.1235							SyE; Table 6	https://doi.org/10.1016/j.enconman.2023.118009
Gasif.MeOH Synthesis	Methanol Synthesis from biomass electrified					0.0392492						Carbon balance	https://doi.org/10.1016/j.enconman.2023.118009
Gasif.MeOH Synthesis	Methanol Synthesis from biomass electrified											SyE, Table 9, 201 kt/a	https://doi.org/10.1016/j.enconman.2023.118009
Gasif.MeOH Synthesis	Methanol Synthesis from biomass electrified											SyE, Table 10, 201 kt/a	https://doi.org/10.1016/j.enconman.2023.118009
Gasif.MeOH Synthesis	Methanol Synthesis from biomass electrified						1107.22	149.552				Assumption 10% price reduction	https://doi.org/10.1016/j.enconman.2023.118009
Gasif.MeOH Synthesis	Methanol Synthesis from biomass electrified								Steam	1.52807		SyE; with district heat price of 38.4 EUR/MWh (table 7); 201 kt/a, 2.1 GJ/t Steam	https://doi.org/10.1016/j.enconman.2023.118009
Gasif.MeOH Synthesis	Methanol Synthesis from biomass electrified								MeOH	1		SyE, normalized	https://doi.org/10.1016/j.enconman.2023.118009
Gasif.MeOH Synthesis	Methanol Synthesis from biomass electrified										20	Table 7	https://doi.org/10.1016/j.enconman.2023.118009
Fischer Tropsch	Biomass Fischer Tropsch			Biomass	2.072							With 0.16 Mt/a and 12.95 GJ/t	https://doi.org/10.1016/j.enconman.2022.115346
Fischer Tropsch	Biomass Fischer Tropsch					0.089096						Based on carbon balacne (Fig. 4 with 0.1 t CO2/GJ	https://doi.org/10.1016/j.enconman.2022.115346
Fischer Tropsch	Biomass Fischer Tropsch											With 186.25 M Pounds, 0.16 Mt Biomass/year, 1.21 Eur/Pound	https://doi.org/10.1016/j.enconman.2022.115346
Fischer Tropsch	Biomass Fischer Tropsch						1267.66					Assumption 10% Cost decrease	https://doi.org/10.1016/j.enconman.2022.115346
Fischer Tropsch	Biomass Fischer Tropsch											Assumption 4% of CAPEX	https://doi.org/10.1016/j.enconman.2022.115346
Fischer Tropsch	Biomass Fischer Tropsch							50.7066				Assumption 4% of CAPEX	https://doi.org/10.1016/j.enconman.2022.115346
Fischer Tropsch	Biomass Fischer Tropsch								Jet fuel	0.0105673		Based on carbon balacne (Fig. 4 with 0.1 t CO2/GJ Biomass, 0.073 t CO2/ t Jet fuel; 42.8 GJ/t Jetfuel)	https://doi.org/10.1016/j.enconman.2022.115346
Fischer Tropsch	Biomass Fischer Tropsch								Light fuel oil	0.00131455		Based on carbon balacne (Fig. 4 with 0.1 t CO2/GJ Biomass, 0.074 t CO2/ t Diesel; 42.6 GJ/t Diesel)	https://doi.org/10.1016/j.enconman.2022.115346
Fischer Tropsch	Biomass Fischer Tropsch								Gasoline	0.00521058		Based on carbon balacne (Fig. 4 with 0.1 t CO2/GJ Biomass, 0.073 t CO2/ t Gasoline; 43.4 GJ/t Gasoline)	https://doi.org/10.1016/j.enconman.2022.115346
Fischer Tropsch	Biomass Fischer Tropsch								CO2 Captured	0.064232		Based on carbon balacne (Fig. 4 with 0.1 t CO2/GJ Biomassl)	https://doi.org/10.1016/j.enconman.2022.115346
Fischer Tropsch	Biomass Fischer Tropsch								Electricity	0.042048		With 20t/h; 1.46 MW; 0.16 t	https://doi.org/10.1016/j.enconman.2022.115346
Fischer Tropsch	Biomass Fischer Tropsch										20		https://doi.org/10.1016/j.enconman.2022.115346
Fischer Tropsch	Biomass Fischer Tropsch			Biomass	2.072							With 0.16 mt/a and 12.95 GJ/t	https://doi.org/10.1016/j.enconman.2022.115346
Fischer Tropsch	Biomass Fischer Tropsch					0.089096						Based on carbon balacne (Fig. 4 with 0.1 t CO2/GJ	https://doi.org/10.1016/j.enconman.2022.115346
Fischer Tropsch	Biomass Fischer Tropsch											With 186.25 M Pounds, 0.16 Mt Biomass/year, 1.21 Eur/Pound	https://doi.org/10.1016/j.enconman.2022.115346
Fischer Tropsch	Biomass Fischer Tropsch						1267.66					Assumption 10% Cost decrease	https://doi.org/10.1016/j.enconman.2022.115346
Fischer Tropsch	Biomass Fischer Tropsch											Assumption 4% of CAPEX	https://doi.org/10.1016/j.enconman.2022.115346
Fischer Tropsch	Biomass Fischer Tropsch							50.7066				Assumption 4% of CAPEX	https://doi.org/10.1016/j.enconman.2022.115346
Fischer Tropsch	Biomass Fischer Tropsch								Jet fuel	0.0105673		Based on carbon balance (Fig. 4 with 0.1 t CO2/GJ Biomass, 0.073 t CO2/ t Jet fuel; 42.8 GJ/t Jetfuel)	https://doi.org/10.1016/j.enconman.2022.115346
Fischer Tropsch	Biomass Fischer Tropsch								Light fuel oil	0.00131455		Based on carbon balance (Fig. 4 with 0.1 t CO2/GJ Biomass, 0.074 t CO2/ t Diesel; 42.6 GJ/t Diesel)	https://doi.org/10.1016/j.enconman.2022.115346
Fischer Tropsch	Biomass Fischer Tropsch								Naphtha	0.005296		Based on carbon balance (Fig. 4 with 0.1 t CO2/GJ Biomass, 0.073 t CO2/ t Naphtha; 42.7 GJ/t Naphtha); Assumption Naphtha instead of gasoline	https://doi.org/10.1016/j.enconman.2022.115346
Fischer Tropsch	Biomass Fischer Tropsch								CO2 Captured	0.064232		Based on carbon balance (Fig. 4 with 0.1 t CO2/GJ Biomass)	https://doi.org/10.1016/j.enconman.2022.115346
Fischer Tropsch	Biomass Fischer Tropsch								Electricity	0.042048		With 20t/h; 1.46 MW; 0.16 t	https://doi.org/10.1016/j.enconman.2022.115346
Fischer Tropsch	Biomass Fischer Tropsch										20		https://doi.org/10.1016/j.enconman.2022.115346
Pyrolysis	Biomass Pyrolysis			Biomass	10		1001.69	99.3846			25	With 17 GJ/t, 6.5 GJ Production	DEA 2024: https://ens.dk/en/our-services/technology-catalogues/technology-data-renewable-fuels
Pyrolysis	Biomass Pyrolysis								Crude	0.145187		0.65 MWhout/MWhin, denstity: 16GJ/tout, 44.77 GJ/t Crude	DEA
Pyrolysis	Biomass Pyrolysis					0.554625			Steam	2.3		0.23 MWhout/MWhin, Carbon balance, 2.1 GJ/t Steam	DEA
Pyrolysis	Biomass Pyrolysis											Carbon balance
Hydropyrolysis	Biomass Pyrolysis	Electricity	0.1	Biomass	9.9							Table 101	DEA
Hydropyrolysis	Biomass Hydropyrolysis								Gasoline	0.09447		with 43.4 GJ/t	DEA
Hydropyrolysis	Biomass Hydropyrolysis								Light fuel oil	0.0446009		with 42.6 GJ/t	DEA
Hydropyrolysis	Biomass Hydropyrolysis						3666.77	107.231			20	With 17 GJ/t Biooil, 6.5 GJ Production Biooil	DEA
CHP	Biomass Hydropyrolysis			Biomass	11							https://www.gov.uk/government/publications/the-potential-of-bioenergy-with-carbon-capture	https://www.gov.uk/government/publications/the-potential-of-bioenergy-with-carbon-capture
CHP	Biomass CHP retrofit CCS					0.1						DEA 2024: https://ens.dk/en/our-services/technology-catalogues/technology-data-renewable-fuels	DEA 2024: https://ens.dk/en/our-services/technology-catalogues/technology-data-renewable-fuels
CHP	Biomass CHP retrofit CCS											https://www.gov.uk/government/publications/the-potential-of-bioenergy-with-carbon-capture	https://www.gov.uk/government/publications/the-potential-of-bioenergy-with-carbon-capture
CHP	Biomass CHP retrofit CCS						561.847					https://www.gov.uk/government/publications/the-potential-of-bioenergy-with-carbon-capture	https://www.gov.uk/government/publications/the-potential-of-bioenergy-with-carbon-capture
CHP	Biomass CHP retrofit CCS											https://www.gov.uk/government/publications/the-potential-of-bioenergy-with-carbon-capture	https://www.gov.uk/government/publications/the-potential-of-bioenergy-with-carbon-capture
CHP	Biomass CHP retrofit CCS							30.9016				https://www.gov.uk/government/publications/the-potential-of-bioenergy-with-carbon-capture	https://www.gov.uk/government/publications/the-potential-of-bioenergy-with-carbon-capture
CHP	Biomass CHP retrofit CCS									1		https://www.gov.uk/government/publications/the-potential-of-bioenergy-with-carbon-capture	https://www.gov.uk/government/publications/the-potential-of-bioenergy-with-carbon-capture
CHP	Biomass CHP retrofit CCS								Electricity	3.366		https://www.gov.uk/government/publications/the-potential-of-bioenergy-with-carbon-capture	https://www.gov.uk/government/publications/the-potential-of-bioenergy-with-carbon-capture
CHP	Biomass CHP retrofit CCS										25	https://www.gov.uk/government/publications/the-potential-of-bioenergy-with-carbon-capture	https://www.gov.uk/government/publications/the-potential-of-bioenergy-with-carbon-capture
Pyrolysis	Biomass CHP retrofit CCS			Biomass	20								https://pyreg.com/de/unsere-technologie/
Pyrolysis	Biomass pyrolysis					0.977273						Carbon Balance, Average	https://buel.bmel.de/index.php/buel/article/view/385 und https://www.tugraz.at/fileadmin/user_upload/Events/Eninnov2016/files/pr/Stream_B/Session_B5/PR_Dengel.pdf
Pyrolysis	Biomass pyrolysis						698					Averaged	https://buel.bmel.de/index.php/buel/article/view/385 und https://www.tugraz.at/fileadmin/user_upload/Events/Eninnov2016/files/pr/Stream_B/Session_B5/PR_Dengel.pdf
Pyrolysis	Biomass pyrolysis											Averaged	https://buel.bmel.de/index.php/buel/article/view/385 und https://www.tugraz.at/fileadmin/user_upload/Events/Eninnov2016/files/pr/Stream_B/Session_B5/PR_Dengel.pdf
Pyrolysis	Biomass pyrolysis							85.505				Averaged	https://buel.bmel.de/index.php/buel/article/view/385 und https://www.tugraz.at/fileadmin/user_upload/Events/Eninnov2016/files/pr/Stream_B/Session_B5/PR_Dengel.pdf
Pyrolysis	Biomass pyrolysis								Biochar	0.272727		1 t CO2 in biochar with carbon content of 1; LHV of 25 GJ/t	https://pyreg.com/de/unsere-technologie/
Pyrolysis	Biomass pyrolysis								Steam	3.80952		with 2.1 GJ/t Steam	https://pyreg.com/de/unsere-technologie/
Pyrolysis	Biomass pyrolysis										20		https://buel.bmel.de/index.php/buel/article/view/384
Gasif.MeOH Synthesis	Biomass pyrolysis	Electricity	4.9949									with 19.9 GJ/t =0.251*19.9	https://doi.org/10.1039/D3EE00478C
Gasif.MeOH Synthesis	Methanol synthesis from biomass with partial combustion												https://doi.org/10.1039/D3EE00478C
Gasif.MeOH Synthesis	Methanol synthesis from biomass with partial combustion			Biomass	47.561							with 19.9 GJ/t =2.39*19.9	https://doi.org/10.1039/D3EE00478C
Gasif.MeOH Synthesis	Methanol synthesis from biomass with partial combustion					3.383						Carbon balance	https://doi.org/10.1039/D3EE00478C
Gasif.MeOH Synthesis	Methanol synthesis from biomass with partial combustion											S16, with 19.9 GJ/t and 8700 h/a	https://doi.org/10.1039/D3EE00478C
Gasif.MeOH Synthesis	Methanol synthesis from biomass with partial combustion						756.352					Assumption 20% Price reduction until 2050	https://doi.org/10.1039/D3EE00478C
Gasif.MeOH Synthesis	Methanol synthesis from biomass with partial combustion											5 % CAPEX	https://doi.org/10.1039/D3EE00478C
Gasif.MeOH Synthesis	Methanol synthesis from biomass with partial combustion							59.52				5 % CAPEX	https://doi.org/10.1039/D3EE00478C
Gasif.MeOH Synthesis	Methanol synthesis from biomass with partial combustion								MeOH	1			https://doi.org/10.1039/D3EE00478C
Gasif.MeOH Synthesis	Methanol synthesis from biomass with partial combustion								Electricity		20		https://doi.org/10.1039/D3EE00478C
Lignin recovery	Lignin recovery						660.429					With 0.92 EUR/$ 2024; 8400 h/a
Lignin recovery	Lignin recovery	Biomass	17.85									Black Liquor; Table 1; Dry matter; 14 GJ/t based on https://www.sciencedirect.com/book/9780120973620/handbook-of-pulping-and-papermaking as cited in https://doi.org/10.1016/j.rser.2018.10.002
Lignin recovery	Lignin recovery								Asphalt	0.3965		Table 1; Dry Matter; Lignin can be used to reduce bitumen demand https://www.pbl.nl/uploads/default/downloads/pbl-2022-decarbonisation-options-for-the-dutch-asphalt-industry_4791.pdf	10.1016/j.biortech.2014.05.062
Lignin recovery	Lignin recovery								Jet fuel	0.0247313		Assumption Butanol, Ethanol and Acetone can be added to aviation fuel; LHV Butanol 34.4; Ethanol 26.7; Acetone 29.6	10.1016/j.biortech.2014.05.062
Lignin recovery	Lignin recovery	Steam	1.29083									Table 2; 2.1 GJ/t MP Steam based on Final Energy Requirements of Steam for Use in Environmental Life Cycle Assessment - Nieuwlaar - 2016 - Journal of Industrial Ecology - Wiley Online Library; 0.4 t Dry lignin	10.1016/j.biortech.2014.05.062
Lignin recovery	Lignin recovery	Electricity	0.0299754									Table 2; 0.4 t dry lignin	10.1016/j.biortech.2014.05.062
Lignin recovery	Lignin recovery							81.7804				Labor cost 0.5 MUSD; 0.92 EUR/$2024; 8400 h/a; Cost for Water, Sulphiric acied, Sodium hydroxide based on Table 3	10.1016/j.biortech.2014.05.062
Lignin recovery	Lignin recovery	CO2	0.56									Table 1 (t/h)	10.1016/j.biortech.2014.05.062
Lignin recovery	Lignin recovery										25	Asumption	10.1016/j.biortech.2014.05.062
HVR for Asphalt	HVR for Asphalt						1		Asphalt	1	50	Use bitumen as Asphalt	10.1016/j.biortech.2014.05.062
HVR for Asphalt	HVR for Asphalt			Bitumen	40.2	0						Feedstock carbon is not considered to be bound in linear accounting; With LHV of 40.2 GJ/t and Emissions of 0.0822 t /GJ
